# Supplementary material for: Inequalities in SARS-CoV-2 case rates by ethnicity, religion, measures of socioeconomic position, English proficiency, and self-reported disability: cohort study of 39 million people in England during the alpha and delta waves
Source: PubMed Central journal article supplement (PMC10568121; doi:10.1136/bmjmed-2022-000187), 2023-04-03
Supplement: bmjmed-2022-000187supp001.pdf [file bmjmed-2022-000187supp001.pdf]

## Supplementary material

Table S1: Sources of variables used in the analyses

| Variable                                                   | Coding                                                                                                                                                                                                     | Source      |
|------------------------------------------------------------|------------------------------------------------------------------------------------------------------------------------------------------------------------------------------------------------------------|-------------|
| Positive test for SARS-CoV-2                               | Tested positive for SARS-CoV-2 between 1 September 2020 and 10 December 2021 and result recorded in national testing data                                                                                  | NPEX/SGSS   |
| Age                                                        | Restricted natural cubic spline (using 10-year age bands)                                                                                                                                                  | 2011 Census |
| Sex                                                        | Female, male                                                                                                                                                                                               | 2011 Census |
| Ethnicity                                                  | White British, Bangladeshi, Black African, Black Caribbean, Chinese, Indian, Mixed, Other, Pakistani, White Other                                                                                          | 2011 Census |
| Religious affiliation                                      | Christian, Buddhist, Hindu, Jewish, Muslim, Sikh, no religion, other religion, religion not stated                                                                                                         | 2011 Census |
| Region                                                     | North East, North West, Yorkshire and The Humber, East Midlands, West Midlands, East of England, London, South East, South West                                                                            | GDPPR       |
| Rural-Urban Classification                                 | Major or minor conurbation; city and town; town and Fringe; villages, hamlets and isolated dwellings                                                                                                       | GDPPR       |
| English Indices of Deprivation                             | Dummy variables representing quintile groups of deprivation, with 1 as the most deprived and 5 as the least deprived groups.                                                                               | GDPPR       |
| National Statistics Socio-economic classification (NS-SEC) | Higher managerial, administrative and professional occupations;<br>Lower managerial, administrative and professional occupations;<br>Intermediate occupations;<br>Small employers and own account workers; | 2011 Census |

|                                           |                                                                                                                                                                                      |                   |
|-------------------------------------------|--------------------------------------------------------------------------------------------------------------------------------------------------------------------------------------|-------------------|
|                                           | Lower supervisory and technical occupations;<br>Semi-routine occupations;<br>Routine occupations;<br>Never worked and long-term unemployed;<br>Not in a household;<br>Not classified |                   |
| <b>Residence type</b>                     | Dummy variables representing private household or other communal establishment, or care home residency                                                                               | GDPPR/2011 Census |
| <b>Household tenure</b>                   | Own, social rented, private rented, other                                                                                                                                            | 2011 Census       |
| <b>Country of birth</b>                   | UK, non-UK                                                                                                                                                                           | 2011 Census       |
| <b>English language proficiency</b>       | Main language, other                                                                                                                                                                 | 2011 Census       |
| <b>Level of highest qualification</b>     | Degree, A-level or equivalent, GCSE or equivalent, no qualification, other                                                                                                           | 2011 Census       |
| <b>Disability</b>                         | Non-disabled, disabled (daily activities limited a little), disabled (daily activities limited a lot)                                                                                | 2011 Census       |
| <b>Body Mass Index (kg/m<sup>2</sup>)</b> | < 18.5, 18.5 to <25, 25 to <30, >= 30, unknown                                                                                                                                       | GDPPR             |
| <b>Learning disability</b>                | No learning disability, Down's syndrome, other learning disability                                                                                                                   | GDPPR             |
| <b>Pre-existing conditions</b>            | Number of pre-existing conditions                                                                                                                                                    | GDPPR/HES         |

NPEX, National Pathology Exchange; SGSS, Second Generation Surveillance System; GCSE, General Certificate of Secondary Education; GDPPR, General Practice Extraction Service Data for Pandemic Planning and Research; HES, Hospital Episode Statistics

Table S2: Characteristics of the study population reported across the full study period (variables not in the main text tables).

| Variable                                                                            | Level                                                            | Count (%)         |
|-------------------------------------------------------------------------------------|------------------------------------------------------------------|-------------------|
| Education level                                                                     | No qualification                                                 | 6,039,757 (15.5)  |
|                                                                                     | Apprenticeship                                                   | 1,131,625 (2.9)   |
|                                                                                     | Level 1                                                          | 4,557,085 (11.7)  |
|                                                                                     | Level 2                                                          | 5,174,885 (13.3)  |
|                                                                                     | Level 3                                                          | 4,065,049 (10.4)  |
|                                                                                     | Level 4                                                          | 8,927,314 (22.9)  |
|                                                                                     | Not classified                                                   | 7,482,144 (19.2)  |
|                                                                                     | Other                                                            | 1,628,335 (4.2)   |
| Household tenure                                                                    | Private rented                                                   | 5,732,235 (14.7)  |
|                                                                                     | Social rented                                                    | 5,953,221 (15.3)  |
|                                                                                     | Owned                                                            | 26,395,380 (67.7) |
|                                                                                     | Other (e.g., live rent free)                                     | 619,926 (1.6)     |
| Care home status                                                                    | No                                                               | 38,823,660 (99.5) |
|                                                                                     | Yes                                                              | 182,534 (0.5)     |
| National Statistics Socio-Economic Classification of the household reference person | 1 Higher managerial, administrative and professional occupations | 5,541,223 (14.2)  |
|                                                                                     | 2 Lower managerial, administrative and professional occupations  | 9,072,504 (23.3)  |
|                                                                                     | 3 Intermediate occupations                                       | 4,024,100 (10.3)  |
|                                                                                     | 4 Small employers and own account workers                        | 5,145,160 (13.2)  |
|                                                                                     | 5 Lower supervisory and technical occupations                    | 3,407,288 (8.7)   |
|                                                                                     | 6 Semi-routine occupations                                       | 4,925,771 (12.6)  |
|                                                                                     | 7 Routine occupations                                            | 4,571,754 (11.7)  |
|                                                                                     | 8 Never worked and long-term unemployed                          | 1,437,647 (3.7)   |
|                                                                                     | Not in a household                                               | 305,432 (0.8)     |
| Country of birth                                                                    | Not classified                                                   | 575,315 (1.5)     |
|                                                                                     | UK                                                               | 34,244,696 (87.8) |

|                              |                                          |                    |
|------------------------------|------------------------------------------|--------------------|
| English language proficiency | Non-UK                                   | 4,761,498 (12.2)   |
|                              | Main language                            | 36,311,243 (93.1)  |
|                              | Well or very well                        | 2,114,632 (5.4)    |
| Rural Urban Classification   | Not well or not at all                   | 580,319 (1.5)      |
|                              | Major or minor conurbation               | 14,546,114 (37.3)  |
|                              | City and town                            | 17,317,517 (44.4)  |
|                              | Town and fringe                          | 3,561,427 (9.1)    |
| BMI category                 | Villages, hamlets and isolated dwellings | 3,581,136<br>(9.2) |
|                              | Underweight                              | 366,743 (0.9)      |
|                              | Ideal                                    | 6,300,076 (16.2)   |
|                              | Overweight                               | 6,386,147 (16.4)   |
|                              | Obese                                    | 5,512,880 (14.1)   |
| Learning condition           | Missing                                  | 20,440,348 (52.4)  |
|                              | Does not have a learning condition       | 38,574,896 (98.9)  |
|                              | Has a learning condition                 | 431,298 (1.1)      |

Table S3: Age-standardised SARS-CoV-2 case rates (per 100,000 person-weeks) by socio-demographic characteristics and wave of the pandemic (variables not in the main text tables).

| Exposure                                                                            |                                                                | Wave two (1 September 2020 to 22 May 2021) |       |          |          | Wave three (23 May 2021 onwards) |       |          |          |
|-------------------------------------------------------------------------------------|----------------------------------------------------------------|--------------------------------------------|-------|----------|----------|----------------------------------|-------|----------|----------|
|                                                                                     |                                                                | Number of cases                            | Rate  | Lower CI | Upper CI | Number of cases                  | Rate  | Lower CI | Upper CI |
| Household tenure                                                                    | Private rented                                                 | 367,298                                    | 168.4 | 167.8    | 169.1    | 548,583                          | 299.4 | 298.5    | 300.3    |
|                                                                                     | Social rented                                                  | 419,093                                    | 193.1 | 192.5    | 193.7    | 508,011                          | 296.3 | 295.5    | 297.1    |
|                                                                                     | Owned                                                          | 1,601,009                                  | 177.8 | 177.5    | 178.1    | 2,237,339                        | 355.1 | 354.6    | 355.6    |
|                                                                                     | Other                                                          | 38,571                                     | 169.3 | 167.6    | 171.0    | 50,985                           | 300.6 | 298.0    | 303.3    |
| National Statistics Socio-Economic Classification of the household reference person | Higher managerial, administrative and professional occupations | 139,872                                    | 102.0 | 100.7    | 103.3    | 229,509                          | 211.3 | 208.8    | 213.7    |
|                                                                                     | Lower managerial, administrative and professional occupations  | 369,283                                    | 128.3 | 127.7    | 128.9    | 498,925                          | 228.8 | 227.7    | 229.9    |
|                                                                                     | Intermediate occupations                                       | 250,852                                    | 141.0 | 140.3    | 141.6    | 299,393                          | 228.8 | 227.8    | 229.8    |
|                                                                                     | Small employers and own account workers                        | 153,985                                    | 127.6 | 126.7    | 128.6    | 163,628                          | 189.7 | 188.1    | 191.3    |
|                                                                                     | Lower supervisory and technical occupations                    | 134,166                                    | 142.5 | 141.7    | 143.3    | 144,680                          | 213.1 | 211.8    | 214.3    |
|                                                                                     | Semi-routine occupations                                       | 299,012                                    | 158.0 | 157.4    | 158.6    | 293,050                          | 211.9 | 211.1    | 212.7    |
|                                                                                     | Routine occupations                                            | 208,805                                    | 145.7 | 145.1    | 146.4    | 203,723                          | 202.9 | 202.0    | 203.9    |
|                                                                                     | Never worked and long-term unemployed                          | 110,573                                    | 153.8 | 152.9    | 154.8    | 92,397                           | 158.8 | 157.8    | 159.8    |
| Country of birth                                                                    | UK                                                             | 2,089,141                                  | 171.7 | 171.5    | 171.9    | 3,081,174                        | 345.0 | 344.6    | 345.4    |
|                                                                                     | Non-UK                                                         | 359,465                                    | 203.1 | 202.4    | 203.9    | 284,288                          | 238.2 | 237.1    | 239.4    |
| English language proficiency                                                        | Main language                                                  | 2,211,286                                  | 171.6 | 171.4    | 171.8    | 3,191,368                        | 342.2 | 341.9    | 342.6    |
|                                                                                     | Speak English very well or well                                | 187,607                                    | 239.4 | 238.2    | 240.6    | 140,685                          | 228.2 | 226.8    | 229.5    |

| Exposure                   |                                          | Wave two (1 September 2020 to 22 May 2021) |       |          |          | Wave three (23 May 2021 onwards) |       |          |          |
|----------------------------|------------------------------------------|--------------------------------------------|-------|----------|----------|----------------------------------|-------|----------|----------|
|                            |                                          | Number of cases                            | Rate  | Lower CI | Upper CI | Number of cases                  | Rate  | Lower CI | Upper CI |
|                            | Do not speak English well or at all      | 49,713                                     | 238.8 | 236.2    | 241.5    | 33,409                           | 194.4 | 191.6    | 197.2    |
| Rural-Urban Classification | Cities and towns                         | 1,005,795                                  | 162.3 | 162.0    | 162.6    | 1,565,237                        | 350.0 | 349.4    | 350.5    |
|                            | Major or minor conurbations              | 1,129,050                                  | 215.0 | 214.6    | 215.3    | 1,223,891                        | 308.7 | 308.1    | 309.2    |
|                            | Towns and fringes                        | 171,629                                    | 139.9 | 139.2    | 140.5    | 307,205                          | 360.1 | 358.8    | 361.4    |
|                            | Villages, hamlets and isolated dwellings | 142,132                                    | 118.8 | 118.1    | 119.4    | 269,129                          | 332.3 | 331.0    | 333.7    |
| Region                     | North East                               | 132,204                                    | 194.7 | 193.6    | 195.7    | 204,171                          | 420.4 | 418.6    | 422.2    |
|                            | North West                               | 400,613                                    | 218.2 | 217.5    | 218.8    | 487,936                          | 363.6 | 362.5    | 364.6    |
|                            | Yorkshire and the Humber                 | 270,098                                    | 192.0 | 191.3    | 192.7    | 384,690                          | 375.8 | 374.6    | 377.0    |
|                            | East Midlands                            | 218,633                                    | 177.9 | 177.1    | 178.6    | 320,396                          | 363.1 | 361.8    | 364.4    |
|                            | West Midlands                            | 282,221                                    | 193.6 | 192.9    | 194.3    | 354,840                          | 332.9 | 331.8    | 334.0    |
|                            | East of England                          | 250,486                                    | 158.4 | 157.8    | 159.1    | 352,650                          | 308.6 | 307.6    | 309.7    |
|                            | London                                   | 406,794                                    | 205.4 | 204.7    | 206.0    | 371,473                          | 241.6 | 240.8    | 242.4    |
|                            | South East                               | 343,314                                    | 150.6 | 150.1    | 151.1    | 525,119                          | 319.4 | 318.6    | 320.3    |
| South West                 | 144,243                                  | 101.3                                      | 100.8 | 101.9    | 364,187  | 370.2                            | 368.9 | 371.4    |          |

CI, confidence interval (95%).

Table S4: Adjusted rate ratios of receiving a positive test for SARS-CoV-2 by sociodemographic characteristics and wave of the pandemic

|                                                                                       |                                                                  | Wave two (1 September 2020 to 22 May 2021) |                    |                    | Wave three (23 May 2021 onwards) |                    |                    |
|---------------------------------------------------------------------------------------|------------------------------------------------------------------|--------------------------------------------|--------------------|--------------------|----------------------------------|--------------------|--------------------|
| Exposure                                                                              | Group                                                            | RR (Model 1)                               | RR (Model 2)       | RR (Model 3)       | RR (Model 1)                     | RR (Model 2)       | RR (Model 3)       |
| Household tenure                                                                      | Owned                                                            | 1 (ref)                                    | 1 (ref)            | 1 (ref)            | 1 (ref)                          | 1 (ref)            | 1 (ref)            |
|                                                                                       | Other                                                            | 0.96 [0.95 - 0.97]                         | 0.97 [0.96 - 0.98] | 0.93 [0.92 - 0.94] | 0.86 [0.85 - 0.86]               | 0.89 [0.88 - 0.89] | 0.92 [0.91 - 0.93] |
|                                                                                       | Private rented                                                   | 0.93 [0.93 - 0.93]                         | 0.92 [0.92 - 0.92] | 0.89 [0.89 - 0.90] | 0.84 [0.84 - 0.84]               | 0.86 [0.86 - 0.86] | 0.89 [0.89 - 0.90] |
|                                                                                       | Social rented                                                    | 1.07 [1.07 - 1.07]                         | 1.02 [1.02 - 1.02] | 0.93 [0.93 - 0.93] | 0.84 [0.84 - 0.84]               | 0.86 [0.86 - 0.86] | 0.90 [0.90 - 0.90] |
| Care home status                                                                      | No                                                               | 1 (ref)                                    | 1 (ref)            | 1 (ref)            | 1 (ref)                          | 1 (ref)            | 1 (ref)            |
|                                                                                       | Yes                                                              | 4.15 [4.11 - 4.20]                         | 4.17 [4.13 - 4.22] | 4.3 [4.25 - 4.35]  | 1.07 [1.04 - 1.10]               | 1.06 [1.03 - 1.09] | 1.32 [1.28 - 1.36] |
| National Statistics Socio-Economic Classification of the household reference person * | 1 Higher managerial, administrative and professional occupations | 1 (ref)                                    | 1 (ref)            | 1 (ref)            | 1 (ref)                          | 1 (ref)            | 1 (ref)            |
|                                                                                       | 2 Lower managerial, administrative and professional occupations  | 1.17 [1.16 - 1.18]                         | 1.16 [1.15 - 1.16] | 1.13 [1.12 - 1.13] | 1.02 [1.02 - 1.02]               | 1.01 [1.01 - 1.01] | 1.01 [1.01 - 1.01] |
|                                                                                       | 3 Intermediate occupations                                       | 1.25 [1.24 - 1.26]                         | 1.20 [1.20 - 1.21] | 1.12 [1.11 - 1.13] | 0.97 [0.97 - 0.98]               | 0.96 [0.95 - 0.96] | 0.96 [0.96 - 0.97] |
|                                                                                       | 4 Small employers and own account workers                        | 1.29 [1.28 - 1.29]                         | 1.29 [1.28 - 1.29] | 1.15 [1.15 - 1.16] | 0.92 [0.91 - 0.92]               | 0.91 [0.91 - 0.91] | 0.95 [0.94 - 0.95] |
|                                                                                       | 5 Lower supervisory and technical occupations                    | 1.34 [1.33 - 1.35]                         | 1.31 [1.30 - 1.32] | 1.19 [1.18 - 1.19] | 0.98 [0.98 - 0.98]               | 0.95 [0.94 - 0.95] | 0.97 [0.97 - 0.97] |
|                                                                                       | 6 Semi-routine occupations                                       | 1.39 [1.38 - 1.40]                         | 1.33 [1.33 - 1.34] | 1.18 [1.18 - 1.19] | 0.92 [0.91 - 0.92]               | 0.89 [0.89 - 0.89] | 0.93 [0.93 - 0.93] |
|                                                                                       | 7 Routine occupations                                            | 1.38 [1.37 - 1.38]                         | 1.32 [1.31 - 1.32] | 1.16 [1.15 - 1.17] | 0.92 [0.91 - 0.92]               | 0.88 [0.88 - 0.88] | 0.93 [0.92 - 0.93] |
|                                                                                       | 8 Never worked and long-term unemployed                          | 1.27 [1.27 - 1.28]                         | 1.15 [1.15 - 1.16] | 0.97 [0.96 - 0.98] | 0.74 [0.74 - 0.74]               | 0.74 [0.73 - 0.74] | 0.81 [0.81 - 0.82] |
| Country of birth                                                                      | UK                                                               | 1 (ref)                                    | 1 (ref)            | 1 (ref)            | 1 (ref)                          | 1 (ref)            | 1 (ref)            |
|                                                                                       | Non-UK                                                           | 1.21 [1.21 - 1.22]                         | 1.14 [1.14 - 1.15] | 1.05 [1.04 - 1.05] | 0.70 [0.70 - 0.71]               | 0.77 [0.76 - 0.77] | 0.96 [0.96 - 0.97] |

|                              |                                          | Wave two (1 September 2020 to 22 May 2021) |                    |                    | Wave three (23 May 2021 onwards) |                    |                    |
|------------------------------|------------------------------------------|--------------------------------------------|--------------------|--------------------|----------------------------------|--------------------|--------------------|
| English language proficiency | Main language                            | 1 (ref)                                    | 1 (ref)            | 1 (ref)            |                                  |                    |                    |
|                              | Well or very well                        | 1.34 [1.34 - 1.35]                         | 1.26 [1.25 - 1.26] | 1.12 [1.11 - 1.12] | 0.68 [0.67 - 0.68]               | 0.74 [0.73 - 0.74] | 0.94 [0.93 - 0.94] |
|                              | Not well or not at all                   | 1.48 [1.47 - 1.49]                         | 1.35 [1.33 - 1.36] | 1.10 [1.09 - 1.11] | 0.58 [0.58 - 0.59]               | 0.62 [0.61 - 0.63] | 0.83 [0.82 - 0.84] |
| Rural-Urban Classification   | Villages, hamlets and isolated dwellings | 1 (ref)                                    | 1 (ref)            | 1 (ref)            | 1 (ref)                          | 1 (ref)            | 1 (ref)            |
|                              | City and town                            | 1.38 [1.37 - 1.38]                         | 1.36 [1.35 - 1.37] | 1.29 [1.28 - 1.29] | 1.07 [1.06 - 1.07]               | 1.07 [1.07 - 1.07] | 1.12 [1.11 - 1.12] |
|                              | Major or minor conurbation               | 1.80 [1.79 - 1.81]                         | 1.60 [1.59 - 1.61] | 1.46 [1.45 - 1.46] | 0.95 [0.95 - 0.95]               | 1.02 [1.01 - 1.02] | 1.11 [1.10 - 1.11] |
|                              | Town and fringe                          | 1.18 [1.17 - 1.19]                         | 1.15 [1.15 - 1.16] | 1.15 [1.14 - 1.16] | 1.09 [1.08 - 1.09]               | 1.08 [1.07 - 1.08] | 1.08 [1.07 - 1.08] |

RR, rate ratio; CI, confidence interval (95%).

Model 1, adjusted for age and sex only; Model 2, plus geography (region and Rural-Urban Classification); Model 3, fully-adjusted model. Note that for Religion the fully adjusted model (model 3) does not adjust for ethnicity.

\* For the National Statistics Socio-Economic classification of the household reference person, model 3 does not adjust for household tenure, due to strong collinearity affecting convergence of the models.



Table S5: Adjusted rate ratios of receiving a positive test for SARS-CoV-2 by sociodemographic characteristics and broad age group during the second wave (1 September 2020 to 22 May 2021)

|                   |                  | Under 65           |                    |                    | 65+                |                    |                    |
|-------------------|------------------|--------------------|--------------------|--------------------|--------------------|--------------------|--------------------|
| Exposure          | Group            | RR (Model 1)       | RR (Model 2)       | RR (Model 3)       | RR (Model 1)       | RR (Model 2)       | RR (Model 3)       |
| Disability status | Not Limited      | 1 (ref)            | 1 (ref)            | 1 (ref)            | 1 (ref)            | 1 (ref)            | 1 (ref)            |
|                   | Limited a little | 0.91 [0.9 - 0.91]  | 0.89 [0.89 - 0.9]  | 0.85 [0.85 - 0.86] | 1.39 [1.38 - 1.4]  | 1.36 [1.34 - 1.37] | 1.14 [1.13 - 1.15] |
|                   | Limited a lot    | 0.84 [0.83 - 0.84] | 0.81 [0.8 - 0.82]  | 0.75 [0.74 - 0.76] | 1.94 [1.93 - 1.96] | 1.82 [1.81 - 1.84] | 1.28 [1.27 - 1.3]  |
| Ethnicity         | White British    | 1 (ref)            | 1 (ref)            | 1 (ref)            | 1 (ref)            | 1 (ref)            | 1 (ref)            |
|                   | Bangladeshi      | 1.97 [1.95 - 1.99] | 1.79 [1.77 - 1.81] | 1.73 [1.71 - 1.75] | 3.45 [3.31 - 3.59] | 2.89 [2.78 - 3.02] | 2.51 [2.41 - 2.62] |
|                   | Black African    | 1.13 [1.12 - 1.14] | 1.04 [1.03 - 1.05] | 1.04 [1.03 - 1.05] | 1.67 [1.6 - 1.75]  | 1.42 [1.36 - 1.48] | 1.36 [1.3 - 1.42]  |
|                   | Black Caribbean  | 1.07 [1.06 - 1.09] | 0.98 [0.97 - 1]    | 0.96 [0.94 - 0.97] | 1.38 [1.34 - 1.43] | 1.18 [1.14 - 1.21] | 1.09 [1.05 - 1.13] |
|                   | Chinese          | 0.53 [0.51 - 0.54] | 0.5 [0.48 - 0.51]  | 0.54 [0.52 - 0.55] | 0.7 [0.65 - 0.76]  | 0.62 [0.58 - 0.67] | 0.69 [0.64 - 0.74] |
|                   | Indian           | 1.55 [1.54 - 1.56] | 1.44 [1.43 - 1.45] | 1.46 [1.45 - 1.47] | 1.93 [1.89 - 1.97] | 1.66 [1.63 - 1.7]  | 1.73 [1.69 - 1.76] |
|                   | Mixed            | 1.09 [1.08 - 1.1]  | 1.04 [1.03 - 1.05] | 1.04 [1.04 - 1.05] | 1.33 [1.27 - 1.39] | 1.22 [1.16 - 1.28] | 1.16 [1.1 - 1.21]  |
|                   | Other            | 1.38 [1.37 - 1.39] | 1.29 [1.28 - 1.3]  | 1.3 [1.29 - 1.31]  | 1.76 [1.71 - 1.8]  | 1.53 [1.49 - 1.57] | 1.55 [1.51 - 1.59] |
|                   | Pakistani        | 1.94 [1.93 - 1.95] | 1.71 [1.7 - 1.72]  | 1.65 [1.64 - 1.66] | 3.4 [3.32 - 3.48]  | 2.84 [2.77 - 2.9]  | 2.6 [2.54 - 2.66]  |
|                   | White Other      | 0.99 [0.98 - 0.99] | 0.96 [0.95 - 0.97] | 0.99 [0.99 - 1]    | 1.14 [1.12 - 1.16] | 1.06 [1.04 - 1.08] | 1.04 [1.02 - 1.06] |
| Education level   | No qualification | 1 (ref)            | 1 (ref)            | 1 (ref)            | 1 (ref)            | 1 (ref)            | 1 (ref)            |
|                   | Apprenticeship   | 1 [0.99 - 1.01]    | 1.06 [1.05 - 1.07] | 1.1 [1.08 - 1.11]  | 0.77 [0.76 - 0.78] | 0.8 [0.79 - 0.81]  | 0.93 [0.91 - 0.94] |
|                   | Level 1          | 0.98 [0.98 - 0.99] | 1.02 [1.02 - 1.03] | 1.04 [1.04 - 1.05] | 0.75 [0.74 - 0.76] | 0.77 [0.76 - 0.79] | 0.88 [0.87 - 0.89] |
|                   | Level 2          | 0.97 [0.97 - 0.98] | 1.02 [1.01 - 1.03] | 1.05 [1.04 - 1.06] | 0.72 [0.71 - 0.73] | 0.76 [0.75 - 0.77] | 0.87 [0.86 - 0.89] |
|                   | Level 3          | 0.94 [0.94 - 0.95] | 0.99 [0.98 - 0.99] | 1.03 [1.02 - 1.03] | 0.7 [0.69 - 0.71]  | 0.73 [0.72 - 0.75] | 0.86 [0.85 - 0.87] |
|                   | Level 4          | 0.78 [0.78 - 0.79] | 0.82 [0.81 - 0.82] | 0.85 [0.84 - 0.85] | 0.6 [0.59 - 0.6]   | 0.63 [0.63 - 0.64] | 0.75 [0.74 - 0.76] |
|                   | Other            | 1.08 [1.08 - 1.09] | 1.08 [1.07 - 1.09] | 1.06 [1.05 - 1.06] | 0.93 [0.92 - 0.94] | 0.93 [0.92 - 0.94] | 0.95 [0.93 - 0.96] |

|                                                                           |                                                                  |                    |                    |                    |                    |                    |                    |
|---------------------------------------------------------------------------|------------------------------------------------------------------|--------------------|--------------------|--------------------|--------------------|--------------------|--------------------|
| <b>English Indices of Deprivation quintile group</b>                      | 1 (most deprived)                                                | 1.39 [1.38 - 1.39] | 1.21 [1.21 - 1.22] | 1.14 [1.14 - 1.15] | 1.95 [1.93 - 1.97] | 1.72 [1.71 - 1.74] | 1.34 [1.32 - 1.35] |
|                                                                           | 2                                                                | 1.25 [1.25 - 1.26] | 1.17 [1.16 - 1.17] | 1.12 [1.12 - 1.13] | 1.5 [1.49 - 1.52]  | 1.44 [1.42 - 1.45] | 1.22 [1.2 - 1.23]  |
|                                                                           | 3                                                                | 1.12 [1.12 - 1.13] | 1.11 [1.11 - 1.12] | 1.09 [1.08 - 1.09] | 1.23 [1.21 - 1.24] | 1.26 [1.25 - 1.28] | 1.14 [1.13 - 1.15] |
|                                                                           | 4                                                                | 1.08 [1.07 - 1.08] | 1.08 [1.07 - 1.08] | 1.06 [1.06 - 1.07] | 1.11 [1.1 - 1.12]  | 1.13 [1.12 - 1.15] | 1.08 [1.06 - 1.09] |
|                                                                           | 5 (least deprived)                                               | 1 (ref)            | 1 (ref)            | 1 (ref)            | 1 (ref)            | 1 (ref)            | 1 (ref)            |
| <b>Religion</b>                                                           | Christian                                                        | 1 (ref)            | 1 (ref)            | 1 (ref)            | 1 (ref)            | 1 (ref)            | 1 (ref)            |
|                                                                           | Buddhist                                                         | 0.8 [0.78 - 0.82]  | 0.8 [0.78 - 0.82]  | 0.84 [0.82 - 0.86] | 0.81 [0.76 - 0.87] | 0.77 [0.72 - 0.83] | 0.83 [0.77 - 0.89] |
|                                                                           | Hindu                                                            | 1.24 [1.23 - 1.25] | 1.18 [1.17 - 1.2]  | 1.21 [1.2 - 1.23]  | 1.59 [1.55 - 1.63] | 1.36 [1.33 - 1.4]  | 1.45 [1.41 - 1.49] |
|                                                                           | Jewish                                                           | 1.07 [1.04 - 1.09] | 1 [0.98 - 1.02]    | 1.03 [1.01 - 1.06] | 1.1 [1.06 - 1.15]  | 0.95 [0.91 - 0.99] | 1.06 [1.02 - 1.11] |
|                                                                           | Muslim                                                           | 1.66 [1.65 - 1.67] | 1.52 [1.51 - 1.53] | 1.48 [1.47 - 1.49] | 2.82 [2.78 - 2.87] | 2.38 [2.34 - 2.42] | 2.19 [2.15 - 2.23] |
|                                                                           | Sikh                                                             | 1.71 [1.69 - 1.73] | 1.61 [1.59 - 1.63] | 1.59 [1.58 - 1.61] | 2.3 [2.23 - 2.37]  | 1.99 [1.93 - 2.06] | 2.04 [1.98 - 2.1]  |
|                                                                           | No religion                                                      | 0.85 [0.85 - 0.85] | 0.87 [0.87 - 0.87] | 0.88 [0.88 - 0.88] | 0.79 [0.78 - 0.8]  | 0.81 [0.8 - 0.82]  | 0.85 [0.84 - 0.86] |
|                                                                           | Other religion                                                   | 0.77 [0.75 - 0.78] | 0.78 [0.77 - 0.8]  | 0.8 [0.78 - 0.82]  | 0.92 [0.87 - 0.98] | 0.92 [0.87 - 0.98] | 0.95 [0.9 - 1.01]  |
|                                                                           | Not stated                                                       | 0.86 [0.86 - 0.87] | 0.87 [0.87 - 0.88] | 0.88 [0.87 - 0.88] | 0.94 [0.93 - 0.95] | 0.95 [0.94 - 0.96] | 0.94 [0.93 - 0.96] |
| <b>Household tenure</b>                                                   | Owned                                                            | 1 (ref)            | 1 (ref)            | 1 (ref)            | 1 (ref)            | 1 (ref)            | 1 (ref)            |
|                                                                           | Other                                                            | 0.91 [0.9 - 0.92]  | 0.93 [0.92 - 0.94] | 0.9 [0.89 - 0.91]  | 1.28 [1.25 - 1.32] | 1.28 [1.25 - 1.31] | 1.09 [1.07 - 1.12] |
|                                                                           | Private rented                                                   | 0.9 [0.9 - 0.91]   | 0.9 [0.89 - 0.9]   | 0.88 [0.88 - 0.89] | 1.25 [1.23 - 1.27] | 1.26 [1.24 - 1.28] | 1.09 [1.07 - 1.1]  |
|                                                                           | Social rented                                                    | 1.01 [1.01 - 1.02] | 0.97 [0.96 - 0.97] | 0.91 [0.91 - 0.91] | 1.53 [1.52 - 1.54] | 1.41 [1.4 - 1.43]  | 1.11 [1.1 - 1.12]  |
| <b>Care home status</b>                                                   | No                                                               | 1 (ref)            | 1 (ref)            | 1 (ref)            | 1 (ref)            | 1 (ref)            | 1 (ref)            |
|                                                                           | Yes                                                              | 2.43 [2.36 - 2.49] | 2.51 [2.44 - 2.57] | 3 [2.92 - 3.08]    | 5.12 [5.05 - 5.18] | 5.09 [5.02 - 5.15] | 4.42 [4.36 - 4.48] |
| <b>National Statistics Socio-Economic Classification of the household</b> | 1 Higher managerial, administrative and professional occupations | 1 (ref)            | 1 (ref)            | 1 (ref)            | 1 (ref)            | 1 (ref)            | 1 (ref)            |
|                                                                           | 2 Lower managerial, administrative and professional occupations  | 1.17 [1.17 - 1.18] | 1.16 [1.15 - 1.17] | 1.13 [1.13 - 1.14] | 1.19 [1.17 - 1.2]  | 1.17 [1.15 - 1.18] | 1.1 [1.09 - 1.12]  |

|                              |                                               |                    |                    |                    |                    |                    |                    |
|------------------------------|-----------------------------------------------|--------------------|--------------------|--------------------|--------------------|--------------------|--------------------|
| reference person*            | 3 Intermediate occupations                    | 1.25 [1.24 - 1.26] | 1.21 [1.2 - 1.21]  | 1.14 [1.13 - 1.14] | 1.32 [1.3 - 1.34]  | 1.26 [1.24 - 1.28] | 1.1 [1.08 - 1.12]  |
|                              | 4 Small employers and own account workers     | 1.28 [1.27 - 1.29] | 1.28 [1.27 - 1.28] | 1.16 [1.15 - 1.16] | 1.36 [1.34 - 1.38] | 1.38 [1.36 - 1.4]  | 1.16 [1.15 - 1.18] |
|                              | 5 Lower supervisory and technical occupations | 1.32 [1.31 - 1.33] | 1.3 [1.29 - 1.3]   | 1.19 [1.18 - 1.2]  | 1.49 [1.47 - 1.52] | 1.42 [1.4 - 1.44]  | 1.17 [1.15 - 1.19] |
|                              | 6 Semi-routine occupations                    | 1.37 [1.36 - 1.37] | 1.31 [1.31 - 1.32] | 1.19 [1.18 - 1.2]  | 1.6 [1.57 - 1.62]  | 1.51 [1.49 - 1.53] | 1.19 [1.17 - 1.2]  |
|                              | 7 Routine occupations                         | 1.33 [1.32 - 1.33] | 1.27 [1.27 - 1.28] | 1.15 [1.15 - 1.16] | 1.71 [1.69 - 1.73] | 1.59 [1.57 - 1.62] | 1.2 [1.19 - 1.22]  |
|                              | 8 Never worked and long-term unemployed       | 1.21 [1.2 - 1.22]  | 1.1 [1.09 - 1.11]  | 0.97 [0.96 - 0.97] | 2 [1.96 - 2.04]    | 1.8 [1.76 - 1.84]  | 1.17 [1.14 - 1.19] |
| Country of birth             | UK                                            | 1 (ref)            | 1 (ref)            | 1 (ref)            | 1 (ref)            | 1 (ref)            | 1 (ref)            |
|                              | Non-UK                                        | 1.17 [1.17 - 1.18] | 1.11 [1.11 - 1.12] | 1.02 [1.01 - 1.02] | 1.51 [1.49 - 1.52] | 1.36 [1.35 - 1.37] | 1 [0.98 - 1.02]    |
| English language proficiency | Main language                                 | 1 (ref)            | 1 (ref)            | 1 (ref)            | 1 (ref)            | 1 (ref)            | 1 (ref)            |
|                              | Well or very well                             | 1.31 [1.3 - 1.31]  | 1.23 [1.22 - 1.24] | 1.11 [1.1 - 1.11]  | 1.86 [1.83 - 1.89] | 1.63 [1.6 - 1.65]  | 1.16 [1.13 - 1.18] |
|                              | Not well or not at all                        | 1.35 [1.34 - 1.37] | 1.24 [1.23 - 1.26] | 1.05 [1.04 - 1.06] | 2.29 [2.25 - 2.34] | 1.94 [1.9 - 1.98]  | 1.12 [1.09 - 1.15] |
| Rural-Urban Classification   | Villages, hamlets and isolated dwellings      | 1 (ref)            | 1 (ref)            | 1 (ref)            | 1 (ref)            | 1 (ref)            | 1 (ref)            |
|                              | City and town                                 | 1.35 [1.34 - 1.36] | 1.33 [1.33 - 1.34] | 1.28 [1.27 - 1.28] | 1.5 [1.48 - 1.52]  | 1.47 [1.45 - 1.49] | 1.32 [1.3 - 1.34]  |
|                              | Major or minor conurbation                    | 1.75 [1.74 - 1.76] | 1.57 [1.56 - 1.58] | 1.44 [1.43 - 1.45] | 2.06 [2.03 - 2.09] | 1.77 [1.74 - 1.79] | 1.49 [1.47 - 1.51] |
|                              | Town and fringe                               | 1.18 [1.17 - 1.19] | 1.15 [1.14 - 1.16] | 1.15 [1.14 - 1.16] | 1.19 [1.17 - 1.21] | 1.16 [1.14 - 1.18] | 1.14 [1.12 - 1.16] |

RR, rate ratio; CI, confidence interval (95%).

Model 1, adjusted for age and sex only; Model 2, plus geography (region and Rural-Urban Classification); Model 3, fully-adjusted model. Note that for Religion the fully adjusted model (model 3) does not adjust for ethnicity.

\* For the National Statistics Socio-Economic classification of the household reference person, model 3 does not adjust for household tenure, due to strong collinearity affecting convergence of the models.

Table S6: Adjusted rate ratios of receiving a positive test for SARS-CoV-2 by sociodemographic characteristics and broad age group during the third wave (23 May 2021 to 10 December 2021)

| Exposure          | Group            | Under 65           |                    |                    | 65+                |                    |                    |
|-------------------|------------------|--------------------|--------------------|--------------------|--------------------|--------------------|--------------------|
|                   |                  | RR (Model 1)       | RR (Model 2)       | RR (Model 3)       | RR (Model 1)       | RR (Model 2)       | RR (Model 3)       |
| Disability status | Not Limited      | 1 (ref)            | 1 (ref)            | 1 (ref)            | 1 (ref)            | 1 (ref)            | 1 (ref)            |
|                   | Limited a little | 0.81 [0.80 - 0.81] | 0.80 [0.80 - 0.81] | 0.83 [0.83 - 0.84] | 1.06 [1.05 - 1.07] | 1.03 [1.02 - 1.04] | 0.97 [0.96 - 0.98] |
|                   | Limited a lot    | 0.62 [0.62 - 0.63] | 0.62 [0.61 - 0.62] | 0.68 [0.67 - 0.68] | 1.18 [1.16 - 1.19] | 1.11 [1.10 - 1.13] | 1.00 [0.99 - 1.01] |
| Ethnicity         | White British    | 1 (ref)            | 1 (ref)            | 1 (ref)            | 1 (ref)            | 1 (ref)            | 1 (ref)            |
|                   | Bangladeshi      | 0.58 [0.57 - 0.58] | 0.63 [0.63 - 0.64] | 0.66 [0.66 - 0.67] | 1.48 [1.39 - 1.59] | 1.63 [1.52 - 1.74] | 1.61 [1.50 - 1.72] |
|                   | Black African    | 0.54 [0.54 - 0.55] | 0.61 [0.60 - 0.61] | 0.64 [0.63 - 0.65] | 0.69 [0.65 - 0.74] | 0.81 [0.75 - 0.86] | 0.81 [0.75 - 0.87] |
|                   | Black Caribbean  | 0.77 [0.76 - 0.77] | 0.86 [0.85 - 0.87] | 0.90 [0.88 - 0.91] | 0.98 [0.94 - 1.02] | 1.08 [1.04 - 1.13] | 1.07 [1.02 - 1.12] |
|                   | Chinese          | 0.45 [0.44 - 0.46] | 0.48 [0.47 - 0.49] | 0.49 [0.48 - 0.50] | 0.41 [0.37 - 0.46] | 0.44 [0.40 - 0.49] | 0.48 [0.43 - 0.53] |
|                   | Indian           | 0.72 [0.72 - 0.73] | 0.77 [0.77 - 0.78] | 0.76 [0.76 - 0.77] | 1.20 [1.17 - 1.23] | 1.29 [1.26 - 1.33] | 1.30 [1.26 - 1.33] |
|                   | Mixed            | 0.85 [0.84 - 0.86] | 0.90 [0.89 - 0.90] | 0.92 [0.92 - 0.93] | 0.92 [0.86 - 0.98] | 0.98 [0.92 - 1.04] | 0.98 [0.92 - 1.04] |
|                   | Other            | 0.61 [0.61 - 0.62] | 0.68 [0.67 - 0.68] | 0.71 [0.70 - 0.71] | 0.95 [0.92 - 0.98] | 1.07 [1.03 - 1.11] | 1.09 [1.05 - 1.13] |
|                   | Pakistani        | 0.59 [0.58 - 0.59] | 0.59 [0.59 - 0.60] | 0.61 [0.60 - 0.61] | 1.44 [1.38 - 1.49] | 1.38 [1.33 - 1.43] | 1.32 [1.27 - 1.37] |
|                   | White Other      | 0.72 [0.72 - 0.73] | 0.78 [0.78 - 0.79] | 0.82 [0.82 - 0.83] | 0.89 [0.87 - 0.91] | 0.97 [0.95 - 0.99] | 0.97 [0.95 - 1.00] |
| Education level   | No qualification | 1 (ref)            | 1 (ref)            | 1 (ref)            | 1 (ref)            | 1 (ref)            | 1 (ref)            |
|                   | Apprenticeship   | 1.37 [1.35 - 1.38] | 1.34 [1.32 - 1.35] | 1.21 [1.20 - 1.22] | 1.02 [1 - 1.04]    | 1.02 [1.01 - 1.04] | 1.05 [1.03 - 1.07] |
|                   | Level 1          | 1.23 [1.22 - 1.24] | 1.22 [1.22 - 1.23] | 1.15 [1.14 - 1.15] | 0.96 [0.94 - 0.97] | 0.99 [0.98 - 1.01] | 1.02 [1.01 - 1.04] |
|                   | Level 2          | 1.27 [1.27 - 1.28] | 1.27 [1.26 - 1.27] | 1.16 [1.16 - 1.17] | 0.94 [0.93 - 0.95] | 0.97 [0.96 - 0.98] | 1.01 [0.99 - 1.02] |
|                   | Level 3          | 1.30 [1.29 - 1.31] | 1.29 [1.29 - 1.30] | 1.19 [1.18 - 1.19] | 0.95 [0.94 - 0.97] | 0.99 [0.97 - 1.00] | 1.02 [1.01 - 1.04] |
|                   | Level 4          | 1.26 [1.25 - 1.27] | 1.30 [1.29 - 1.31] | 1.20 [1.20 - 1.21] | 0.88 [0.87 - 0.89] | 0.93 [0.92 - 0.94] | 0.98 [0.97 - 0.99] |

|                                               |                                                                  |                    |                    |                    |                    |                    |                    |
|-----------------------------------------------|------------------------------------------------------------------|--------------------|--------------------|--------------------|--------------------|--------------------|--------------------|
|                                               | Other                                                            | 0.94 [0.93 - 0.95] | 1.00 [0.99 - 1.01] | 1.08 [1.07 - 1.09] | 0.99 [0.97 – 1.00] | 1.02 [1 - 1.04]    | 1.03 [1.01 - 1.04] |
| English Indices of Deprivation quintile group | 1 (most deprived)                                                | 0.85 [0.85 - 0.86] | 0.82 [0.82 - 0.82] | 0.92 [0.92 - 0.92] | 1.29 [1.27 - 1.3]  | 1.12 [1.11 - 1.14] | 1.09 [1.08 - 1.11] |
|                                               | 2                                                                | 0.88 [0.88 - 0.88] | 0.89 [0.89 - 0.90] | 0.96 [0.95 - 0.96] | 1.15 [1.14 - 1.17] | 1.11 [1.09 - 1.12] | 1.08 [1.07 - 1.10] |
|                                               | 3                                                                | 0.92 [0.92 - 0.92] | 0.94 [0.93 - 0.94] | 0.97 [0.97 - 0.97] | 1.05 [1.03 - 1.06] | 1.05 [1.04 - 1.07] | 1.04 [1.02 - 1.05] |
|                                               | 4                                                                | 0.97 [0.96 - 0.97] | 0.97 [0.96 - 0.97] | 0.98 [0.98 - 0.99] | 1.05 [1.03 - 1.06] | 1.04 [1.03 - 1.06] | 1.03 [1.02 - 1.05] |
|                                               | 5 (least deprived)                                               | 1 (ref)            | 1 (ref)            | 1 (ref)            | 1 (ref)            | 1 (ref)            | 1 (ref)            |
| Religion                                      | Christian                                                        | 1 (ref)            | 1 (ref)            | 1 (ref)            | 1 (ref)            | 1 (ref)            | 1 (ref)            |
|                                               | Buddhist                                                         | 0.64 [0.62 - 0.65] | 0.68 [0.66 - 0.69] | 0.71 [0.69 - 0.72] | 0.59 [0.54 - 0.65] | 0.65 [0.59 - 0.70] | 0.68 [0.62 - 0.74] |
|                                               | Hindu                                                            | 0.74 [0.73 - 0.75] | 0.83 [0.82 - 0.84] | 0.82 [0.82 - 0.83] | 1.13 [1.10 - 1.17] | 1.27 [1.22 - 1.31] | 1.28 [1.24 - 1.33] |
|                                               | Jewish                                                           | 0.82 [0.80 - 0.83] | 0.94 [0.92 - 0.96] | 0.92 [0.9 - 0.94]  | 1.06 [1.01 - 1.12] | 1.19 [1.14 - 1.26] | 1.22 [1.16 - 1.28] |
|                                               | Muslim                                                           | 0.59 [0.59 - 0.60] | 0.63 [0.63 - 0.64] | 0.66 [0.66 - 0.66] | 1.24 [1.21 - 1.27] | 1.28 [1.25 - 1.31] | 1.25 [1.22 - 1.29] |
|                                               | Sikh                                                             | 0.79 [0.78 - 0.80] | 0.83 [0.82 - 0.85] | 0.82 [0.81 - 0.83] | 1.32 [1.27 - 1.38] | 1.39 [1.33 - 1.45] | 1.38 [1.32 - 1.44] |
|                                               | No religion                                                      | 0.96 [0.96 - 0.96] | 0.96 [0.96 - 0.96] | 0.98 [0.97 - 0.98] | 0.83 [0.82 - 0.84] | 0.85 [0.84 - 0.86] | 0.87 [0.86 - 0.88] |
|                                               | Other religion                                                   | 0.76 [0.75 - 0.78] | 0.78 [0.77 - 0.80] | 0.79 [0.78 - 0.81] | 0.91 [0.86 - 0.97] | 0.97 [0.91 - 1.03] | 0.97 [0.92 - 1.03] |
|                                               | Not stated                                                       | 0.87 [0.87 - 0.88] | 0.89 [0.88 - 0.89] | 0.90 [0.89 - 0.90] | 0.84 [0.82 - 0.85] | 0.86 [0.84 - 0.87] | 0.86 [0.85 - 0.88] |
| Household tenure                              | Owned                                                            | 1 (ref)            | 1 (ref)            | 1 (ref)            | 1 (ref)            | 1 (ref)            | 1 (ref)            |
|                                               | Other                                                            | 0.85 [0.84 - 0.85] | 0.88 [0.87 - 0.89] | 0.92 [0.91 - 0.92] | 0.98 [0.94 - 1.01] | 0.99 [0.96 - 1.02] | 0.95 [0.92 - 0.99] |
|                                               | Private rented                                                   | 0.84 [0.84 - 0.84] | 0.86 [0.86 - 0.86] | 0.90 [0.89 - 0.90] | 0.93 [0.91 - 0.95] | 0.95 [0.93 - 0.96] | 0.91 [0.89 - 0.92] |
|                                               | Social rented                                                    | 0.83 [0.83 - 0.83] | 0.85 [0.85 - 0.86] | 0.90 [0.90 - 0.91] | 1.01 [1.00 - 1.02] | 0.98 [0.97 - 0.99] | 0.91 [0.90 - 0.92] |
| Care home status                              | No                                                               | 1 (ref)            | 1 (ref)            | 1 (ref)            | 1 (ref)            | 1 (ref)            | 1 (ref)            |
|                                               | Yes                                                              | 0.58 [0.55 - 0.61] | 0.57 [0.54 - 0.60] | 0.84 [0.80 - 0.88] | 1.72 [1.67 - 1.78] | 1.69 [1.64 - 1.75] | 1.65 [1.59 - 1.70] |
| National Statistics Socio-Economic            | 1 Higher managerial, administrative and professional occupations | 1 (ref)            | 1 (ref)            | 1 (ref)            | 1 (ref)            | 1 (ref)            | 1 (ref)            |

|                                                          |                                                                 |                    |                    |                    |                    |                    |                    |
|----------------------------------------------------------|-----------------------------------------------------------------|--------------------|--------------------|--------------------|--------------------|--------------------|--------------------|
| <b>Classification of the household reference person*</b> | 2 Lower managerial, administrative and professional occupations | 1.02 [1.01 - 1.02] | 1.01 [1.00 - 1.01] | 1.01 [1.01 - 1.02] | 1.05 [1.04 - 1.07] | 1.03 [1.02 - 1.05] | 1.02 [1.00 - 1.03] |
|                                                          | 3 Intermediate occupations                                      | 0.97 [0.97 - 0.98] | 0.96 [0.95 - 0.96] | 0.98 [0.98 - 0.99] | 1.05 [1.03 - 1.06] | 1.01 [0.99 - 1.03] | 0.97 [0.96 - 0.99] |
|                                                          | 4 Small employers and own account workers                       | 0.91 [0.9 - 0.91]  | 0.9 [0.9 - 0.9]    | 0.95 [0.95 - 0.95] | 1.06 [1.05 - 1.08] | 1.06 [1.04 - 1.08] | 1.01 [1 - 1.03]    |
|                                                          | 5 Lower supervisory and technical occupations                   | 0.97 [0.97 - 0.97] | 0.94 [0.93 - 0.94] | 0.98 [0.97 - 0.98] | 1.13 [1.11 - 1.15] | 1.06 [1.04 - 1.08] | 1 [0.98 - 1.02]    |
|                                                          | 6 Semi-routine occupations                                      | 0.91 [0.9 - 0.91]  | 0.88 [0.87 - 0.88] | 0.95 [0.95 - 0.96] | 1.11 [1.1 - 1.13]  | 1.05 [1.03 - 1.06] | 0.98 [0.97 - 1]    |
|                                                          | 7 Routine occupations                                           | 0.9 [0.89 - 0.9]   | 0.87 [0.86 - 0.87] | 0.94 [0.94 - 0.95] | 1.15 [1.14 - 1.17] | 1.06 [1.05 - 1.08] | 0.99 [0.97 - 1]    |
|                                                          | 8 Never worked and long-term unemployed                         | 0.73 [0.72 - 0.73] | 0.73 [0.73 - 0.73] | 0.86 [0.85 - 0.86] | 1.01 [0.99 - 1.04] | 0.96 [0.93 - 0.99] | 0.86 [0.84 - 0.89] |
| <b>Country of birth</b>                                  | UK                                                              | 1 (ref)            | 1 (ref)            | 1 (ref)            | 1 (ref)            | 1 (ref)            | 1 (ref)            |
|                                                          | Non-UK                                                          | 0.68 [0.68 - 0.68] | 0.74 [0.74 - 0.75] | 0.94 [0.93 - 0.94] | 0.97 [0.96 - 0.98] | 1.06 [1.04 - 1.07] | 0.95 [0.92 - 0.97] |
| <b>English language proficiency</b>                      | Main language                                                   | 1 (ref)            | 1 (ref)            | 1 (ref)            | 1 (ref)            | 1 (ref)            | 1 (ref)            |
|                                                          | Well or very well                                               | 0.66 [0.66 - 0.67] | 0.72 [0.72 - 0.73] | 0.92 [0.92 - 0.93] | 1.05 [1.02 - 1.07] | 1.13 [1.11 - 1.16] | 1.02 [0.99 - 1.06] |
|                                                          | Not well or not at all                                          | 0.54 [0.54 - 0.55] | 0.58 [0.58 - 0.59] | 0.79 [0.78 - 0.8]  | 1.17 [1.13 - 1.2]  | 1.2 [1.17 - 1.24]  | 1.05 [1.01 - 1.09] |
| <b>Rural-Urban Classification</b>                        | Villages, hamlets and isolated dwellings                        | 1 (ref)            | 1 (ref)            | 1 (ref)            | 1 (ref)            | 1 (ref)            | 1 (ref)            |
|                                                          | City and town                                                   | 1.05 [1.04 - 1.05] | 1.05 [1.05 - 1.05] | 1.1 [1.1 - 1.11]   | 1.24 [1.22 - 1.26] | 1.24 [1.23 - 1.26] | 1.21 [1.2 - 1.23]  |
|                                                          | Major or minor conurbation                                      | 0.92 [0.91 - 0.92] | 0.99 [0.99 - 1]    | 1.09 [1.08 - 1.09] | 1.35 [1.34 - 1.37] | 1.34 [1.32 - 1.36] | 1.29 [1.27 - 1.31] |
|                                                          | Town and fringe                                                 | 1.08 [1.07 - 1.08] | 1.07 [1.06 - 1.07] | 1.07 [1.06 - 1.08] | 1.16 [1.14 - 1.18] | 1.14 [1.12 - 1.16] | 1.13 [1.11 - 1.15] |

RR, rate ratio; CI, confidence interval (95%).

Model 1, adjusted for age and sex only; Model 2, plus geography (region and Rural-Urban Classification); Model 3, fully-adjusted model. Note that for Religion the fully adjusted model (model 3) does not adjust for ethnicity.

\* For the National Statistics Socio-Economic classification of the household reference person, model 3 does not adjust for household tenure, due to strong collinearity affecting convergence of the models.



Plot S1: Rate ratios by wave of the pandemic – Geographical variables

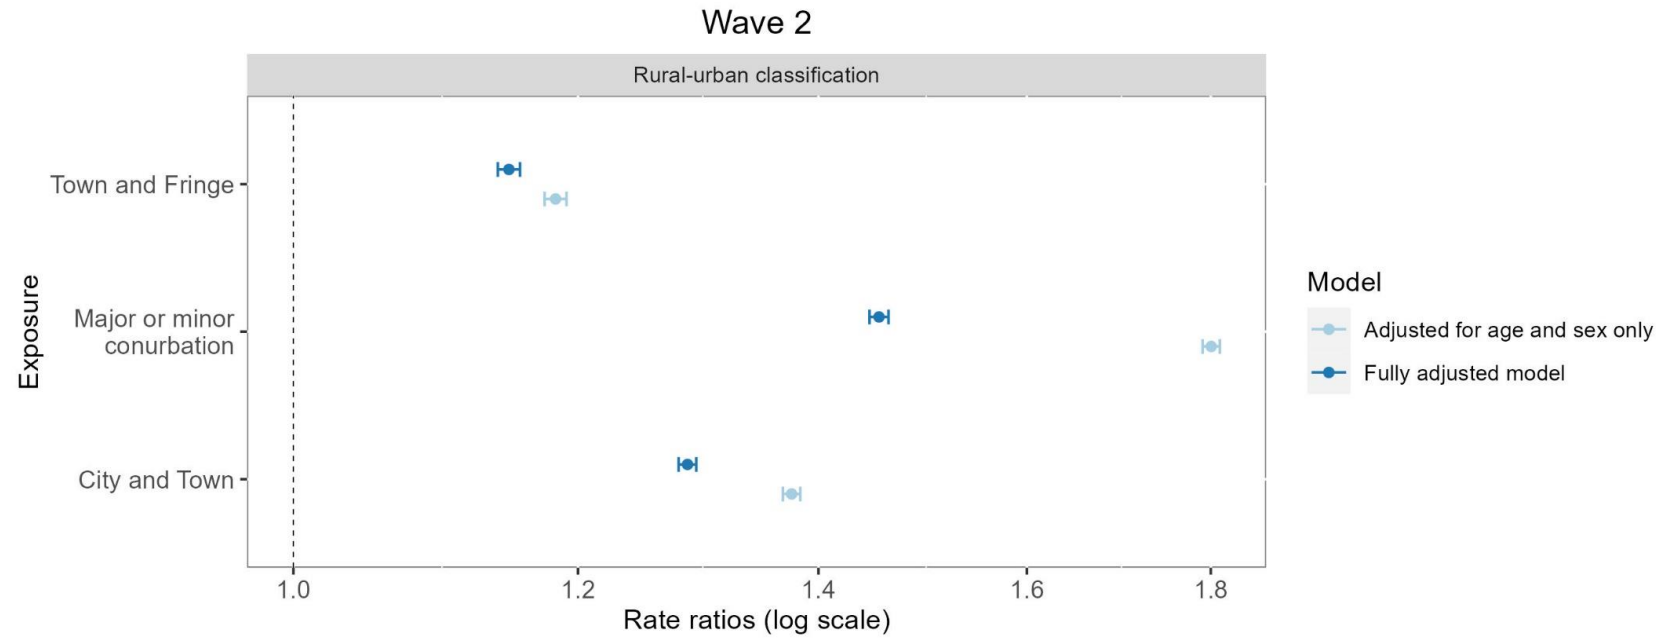



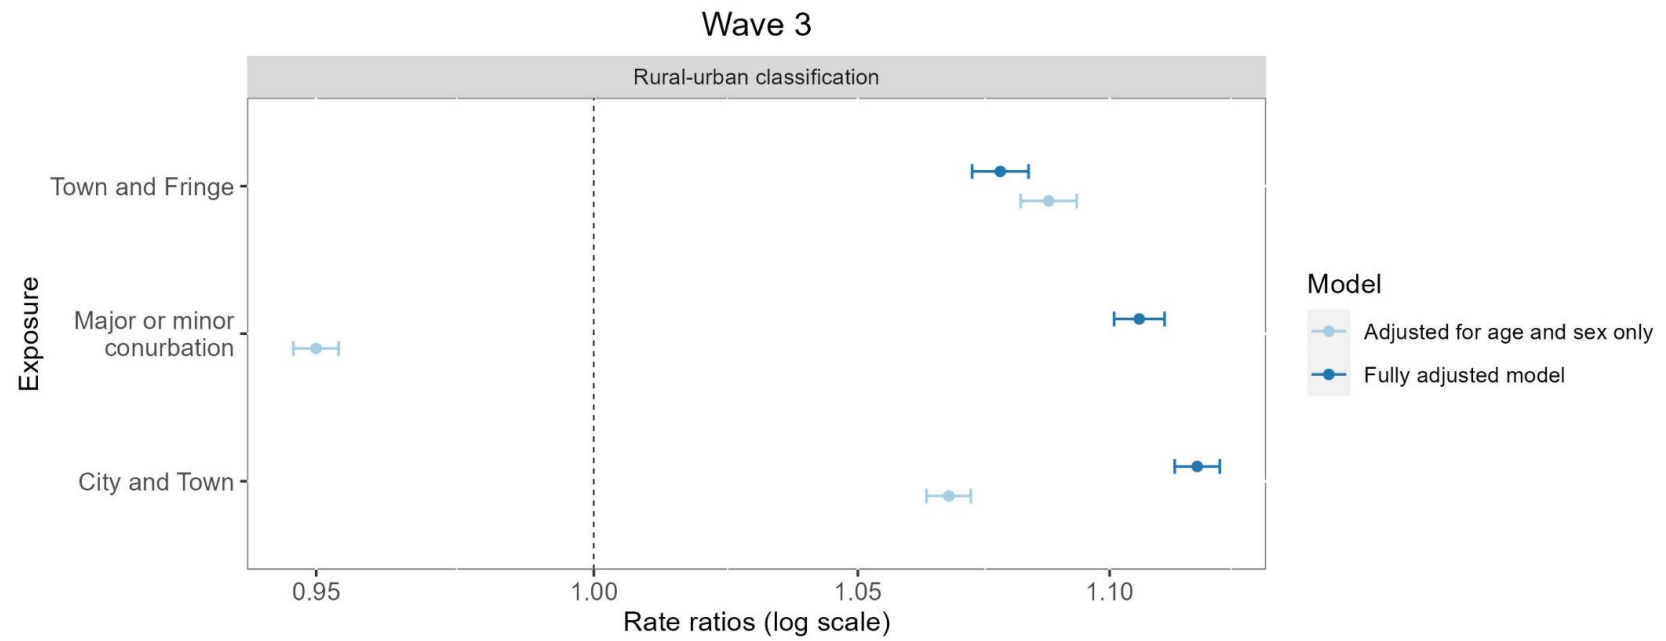

Plot S2: Rate ratios by wave of the pandemic – sociodemographic variables

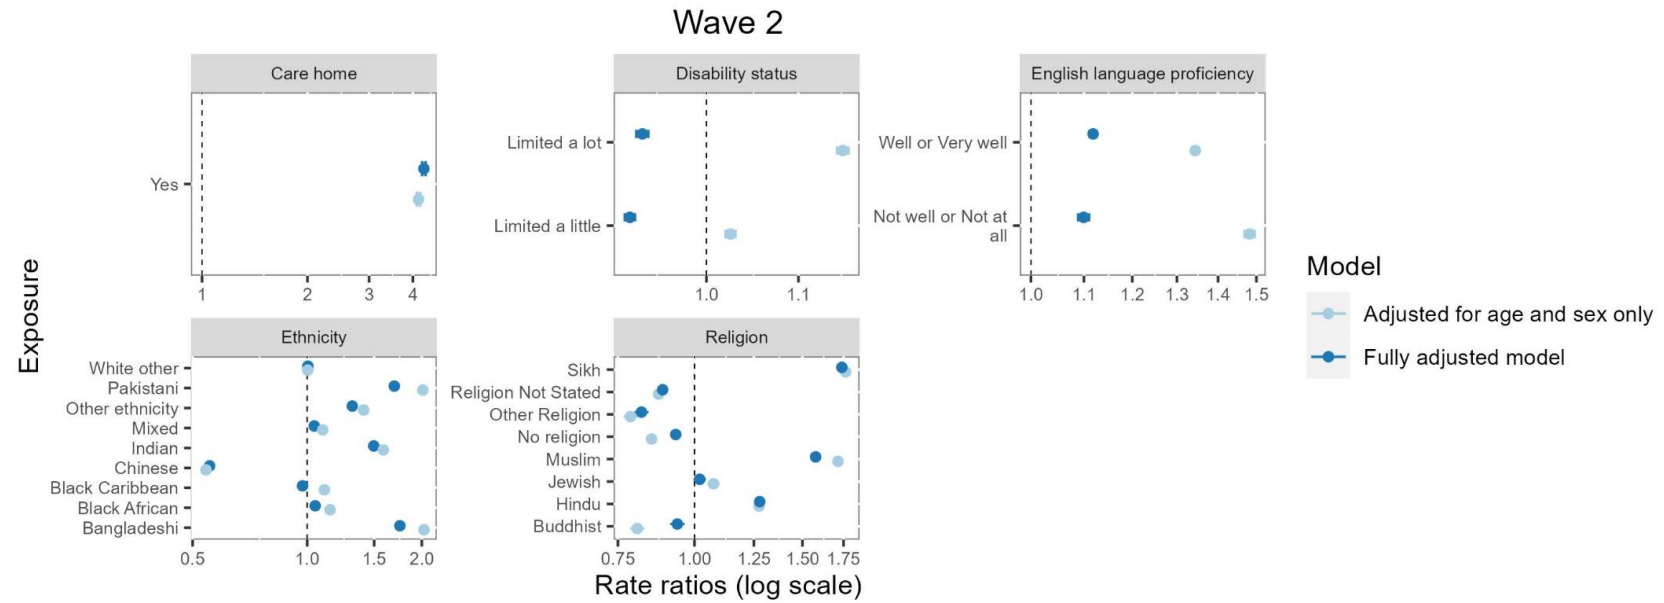

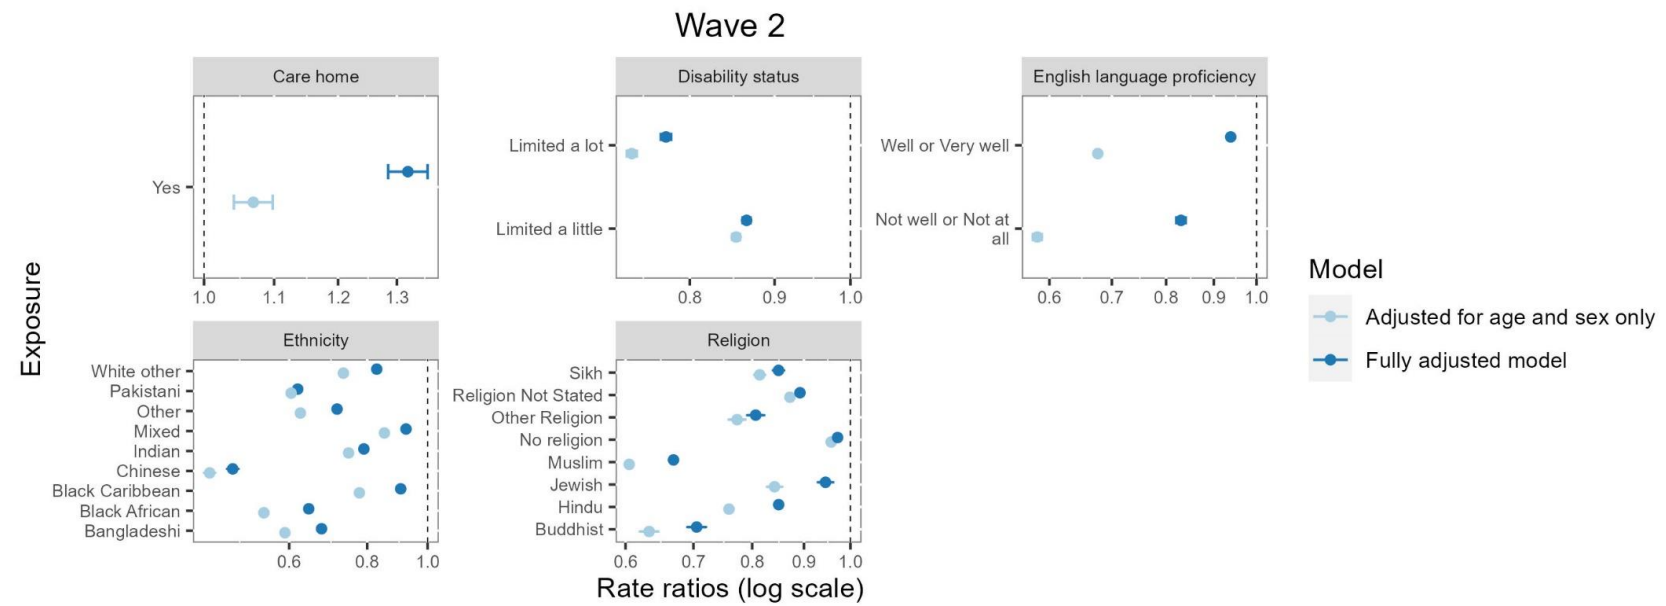

For Religion, the fully adjusted model does not adjust for ethnicity.

Plot S3: Rate ratios by wave of the pandemic – socioeconomic variables

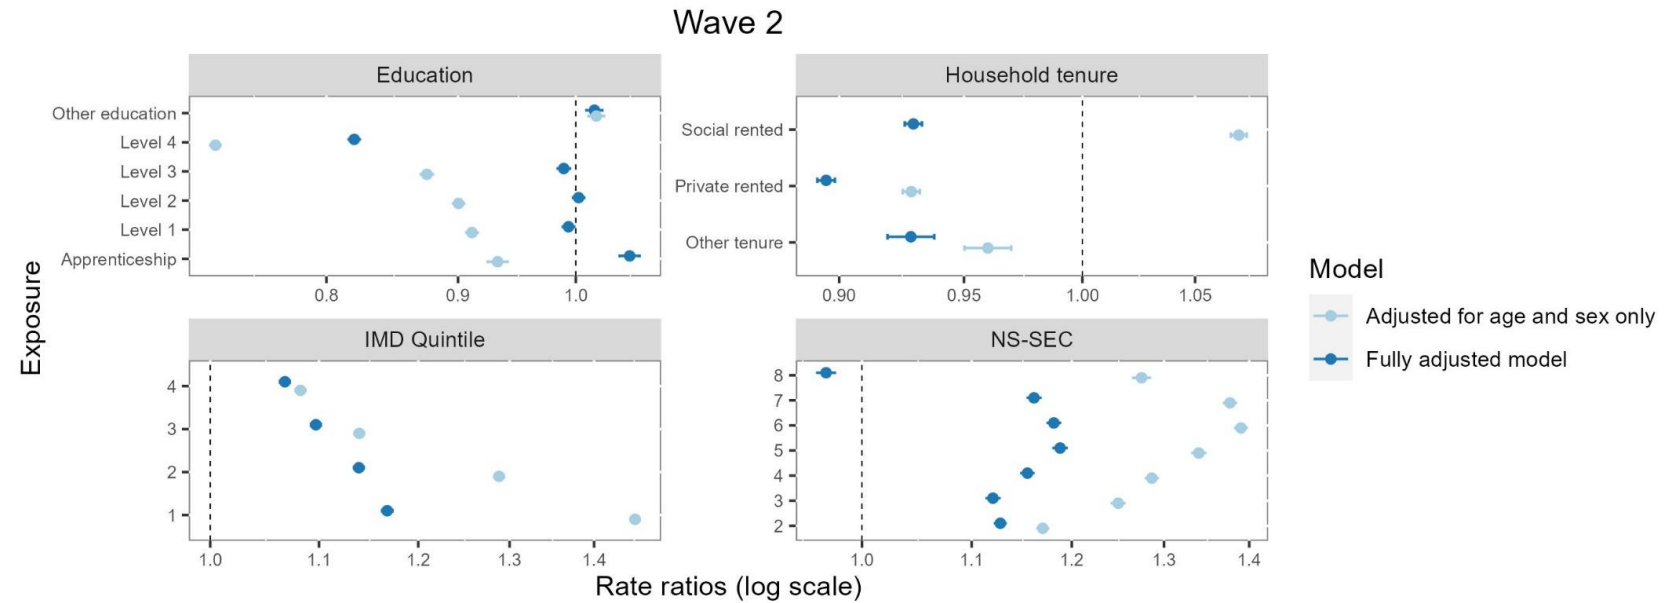

For NS-SEC, the fully-adjusted model does not adjust for household tenure.

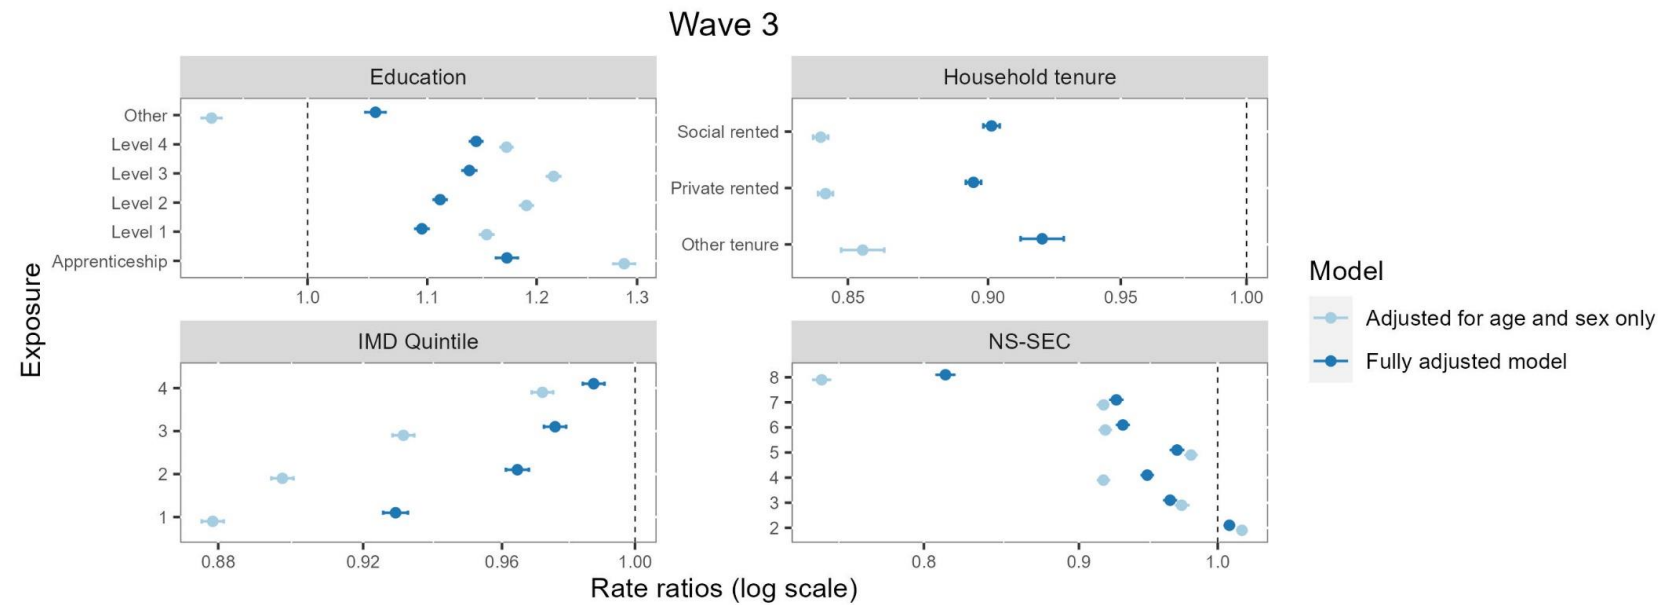

For NS-SEC, the fully-adjusted model does not adjust for household tenure.

\* For the National Statistics Socio-Economic classification (NS-SEC) of the household reference person, the fully-adjusted model does not adjust for household tenure, due to strong collinearity affecting convergence of the models. Please see Table S2 for a look-up of the NS-SEC group which corresponds to the given number (omitted within the plot due to text length).
