# Supplementary material for: Inequalities in SARS-CoV-2 case rates by ethnicity, religion, measures of socioeconomic position, English proficiency, and self-reported disability: cohort study of 39 million people in England during the alpha and delta waves
Source: PubMed Central journal article supplement (PMC10568121; doi:10.1136/bmjmed-2022-000187), 2023-04-03
Supplement: bmjmed-2022-000187supp002.pdf [file bmjmed-2022-000187supp002.pdf]

| term        | p.value  | rr       | lower_ci | upper_ci |
|-------------|----------|----------|----------|----------|
| (Intercept) | 0.981382 | 0.953584 | 0.017607 | 51.6443  |
| age_1_1     | 2.67E-07 | 0.135376 | 0.063203 | 0.289964 |
| age_1_2     | 0.00029  | 0.406031 | 0.249381 | 0.661081 |
| age_1_3     | 2.52E-05 | 0.476776 | 0.337794 | 0.672939 |
| age_1_4     | 2.40E-05 | 0.56123  | 0.42927  | 0.733756 |
| age_1_5     | 1.17E-06 | 0.578988 | 0.464471 | 0.721739 |
| age_1_6     | 8.33E-05 | 0.68196  | 0.563573 | 0.825215 |
| age_1_7     | 0.781074 | 1.025131 | 0.860517 | 1.221234 |
| age_1_8     | 1.13E-08 | 0.611793 | 0.516839 | 0.724191 |
| age_1_9     | 2.62E-14 | 0.468773 | 0.385733 | 0.569689 |
| age_2_1     | 1.23E-08 | 1.149051 | 1.095407 | 1.205322 |
| age_2_2     | 0.001656 | 1.03195  | 1.011926 | 1.052371 |
| age_2_3     | 3.83E-05 | 1.021041 | 1.010971 | 1.031211 |
| age_2_4     | 4.15E-05 | 1.012697 | 1.006605 | 1.018825 |
| age_2_5     | 6.67E-08 | 1.011406 | 1.007251 | 1.015578 |
| age_2_6     | 0.000147 | 1.006192 | 1.00299  | 1.009404 |
| age_2_7     | 3.05E-05 | 0.993947 | 0.991115 | 0.996788 |
| age_2_8     | 7.99E-07 | 1.006917 | 1.004164 | 1.009677 |
| age_2_9     | 3.68E-13 | 1.012726 | 1.009278 | 1.016186 |
| age_3_1     | 3.53E-09 | 0.997014 | 0.996025 | 0.998004 |
| age_3_2     | 0.00499  | 0.999628 | 0.999368 | 0.999888 |
| age_3_3     | 5.39E-05 | 0.999804 | 0.999709 | 0.999899 |
| age_3_4     | 6.96E-05 | 0.999908 | 0.999862 | 0.999953 |
| age_3_5     | 2.06E-09 | 0.999921 | 0.999895 | 0.999947 |
| age_3_6     | 3.46E-05 | 0.999961 | 0.999943 | 0.99998  |
| age_3_7     | 3.93E-11 | 1.000053 | 1.000037 | 1.000069 |
| age_3_8     | 0.000108 | 0.999972 | 0.999957 | 0.999986 |
| age_3_9     | 1.36E-11 | 0.999941 | 0.999923 | 0.999958 |
| sex_1       | 0        | 0.911145 | 0.907709 | 0.914594 |
| region_1    | 0        | 1.077653 | 1.067799 | 1.087598 |
| region_2    | 0        | 1.057706 | 1.05053  | 1.064931 |
| region_3    | 0        | 0.70705  | 0.700732 | 0.713425 |
| region_4    | 0        | 1.19457  | 1.186926 | 1.202262 |
| region_5    | 0        | 1.065165 | 1.054419 | 1.076019 |
| region_6    | 0        | 1.065358 | 1.057336 | 1.07344  |
| region_7    | 4.60E-13 | 1.033236 | 1.024127 | 1.042427 |
| region_8    | 0        | 1.098494 | 1.087718 | 1.109377 |
| ruralurban  | 0        | 1.168276 | 1.155794 | 1.180893 |
| ruralurban  | 0        | 1.501075 | 1.487736 | 1.514534 |
| ruralurban  | 0        | 1.308319 | 1.297323 | 1.319407 |
| bmi_categ   | 0        | 1.29785  | 1.280619 | 1.315314 |
| bmi_categ   | 0        | 1.129059 | 1.11414  | 1.144177 |
| bmi_categ   | 0        | 1.453731 | 1.434403 | 1.473319 |
| health_cor  | 0        | 1.065634 | 1.063442 | 1.067832 |
| learning_c  | 0        | 1.121053 | 1.102461 | 1.139959 |
| ethnicity_1 | 1.83E-05 | 0.971029 | 0.958058 | 0.984175 |
| ethnicity_2 | 0        | 1.71739  | 1.566244 | 1.883121 |
| ethnicity_3 | 0        | 1.154881 | 1.131914 | 1.178314 |
| ethnicity_4 | 0.618673 | 1.004883 | 0.985793 | 1.024342 |

|             |          |          |          |          |
|-------------|----------|----------|----------|----------|
| ethnicity_5 | 0        | 1.438907 | 1.395687 | 1.483465 |
| ethnicity_6 | 0        | 0.656147 | 0.610354 | 0.705377 |
| ethnicity_7 | 0.010294 | 0.977574 | 0.960781 | 0.994659 |
| ethnicity_8 | 2.69E-06 | 1.040162 | 1.023196 | 1.057409 |
| ethnicity_9 | 0.004334 | 1.450309 | 1.123386 | 1.872372 |
| imd_quint   | 0        | 1.084393 | 1.077715 | 1.091112 |
| imd_quint   | 0        | 1.128085 | 1.121138 | 1.135074 |
| imd_quint   | 0        | 1.172709 | 1.165489 | 1.179974 |
| imd_quint   | 0        | 1.211917 | 1.204048 | 1.219838 |
| religion_1  | 0.047245 | 1.20049  | 1.002222 | 1.437982 |
| religion_2  | 0        | 0.869482 | 0.861473 | 0.877565 |
| religion_3  | 0        | 0.697809 | 0.671885 | 0.724733 |
| religion_4  | 0        | 0.883163 | 0.878747 | 0.887601 |
| religion_5  | 0        | 1.331518 | 1.275015 | 1.390526 |
| religion_6  | 0.516366 | 1.009294 | 0.981484 | 1.037893 |
| religion_7  | 0.397491 | 0.91806  | 0.753116 | 1.119128 |
| religion_8  | 0        | 0.700791 | 0.659415 | 0.744762 |
| education_1 | 0.691375 | 0.998137 | 0.988992 | 1.007368 |
| education_2 | 0.947247 | 0.999233 | 0.976786 | 1.022197 |
| education_3 | 0        | 0.847267 | 0.841813 | 0.852755 |
| education_4 | 0.102068 | 1.00611  | 0.99879  | 1.013484 |
| education_5 | 0.000725 | 1.011677 | 1.004889 | 1.018511 |
| education_6 | 0.473848 | 0.997503 | 0.990702 | 1.004351 |
| education_7 | 1.96E-11 | 1.042184 | 1.02968  | 1.05484  |
| tenure_1    | 0        | 0.951765 | 0.946634 | 0.956924 |
| tenure_2    | 0        | 0.914052 | 0.908953 | 0.919179 |
| tenure_3    | 4.44E-16 | 0.94188  | 0.92845  | 0.955505 |
| tenure_4    | 0        | 0.850101 | 0.834558 | 0.865934 |
| care_home   | 0        | 4.19185  | 4.128999 | 4.255658 |
| english_lar | 0.001063 | 1.079401 | 1.031131 | 1.129931 |
| english_lar | 0.046677 | 0.919262 | 0.846089 | 0.998764 |
| ethnicity_r | 0.281484 | 1.196459 | 0.863243 | 1.6583   |
| ethnicity_r | 0.001413 | 0.942622 | 0.909034 | 0.977452 |
| ethnicity_r | 0.428755 | 1.056739 | 0.921728 | 1.211527 |
| ethnicity_r | 0        | 0.838152 | 0.817661 | 0.859156 |
| ethnicity_r | 0.329129 | 0.974582 | 0.925465 | 1.026305 |
| ethnicity_r | 0.190682 | 0.952216 | 0.884881 | 1.024675 |
| ethnicity_r | 0.105065 | 1.25788  | 0.953117 | 1.660092 |
| ethnicity_r | 0.265937 | 0.905671 | 0.760606 | 1.078405 |
| ethnicity_r | 0.261085 | 0.846756 | 0.633529 | 1.131749 |
| ethnicity_r | 0.677406 | 1.022098 | 0.92208  | 1.132966 |
| ethnicity_r | 0.783366 | 0.927939 | 0.544463 | 1.581505 |
| ethnicity_r | 1.54E-07 | 0.646624 | 0.549458 | 0.760973 |
| ethnicity_r | 2.24E-08 | 0.747779 | 0.675353 | 0.827972 |
| ethnicity_r | 0.142317 | 0.650774 | 0.366605 | 1.155212 |
| ethnicity_r | 0.77963  | 1.046768 | 0.759972 | 1.441795 |
| ethnicity_r | 0.403382 | 0.764617 | 0.407425 | 1.434964 |
| ethnicity_r | 0.019821 | 1.244522 | 1.035325 | 1.495989 |
| ethnicity_r | 0.226437 | 0.970834 | 0.92537  | 1.018533 |
| ethnicity_r | 0.171008 | 1.107181 | 0.956995 | 1.280937 |

|             |          |          |          |          |
|-------------|----------|----------|----------|----------|
| ethnicity_r | 0        | 0.770431 | 0.735633 | 0.806875 |
| ethnicity_r | 0        | 0.78236  | 0.744367 | 0.822292 |
| ethnicity_r | 0.501413 | 1.040295 | 0.927122 | 1.167283 |
| ethnicity_r | 0.224894 | 1.132258 | 0.926452 | 1.383782 |
| ethnicity_r | 1.60E-09 | 1.261413 | 1.169763 | 1.360242 |
| ethnicity_r | 0.113274 | 1.240158 | 0.950135 | 1.618709 |
| ethnicity_r | 0.476641 | 1.019656 | 0.966436 | 1.075807 |
| ethnicity_r | 0.720893 | 1.035225 | 0.856156 | 1.251747 |
| ethnicity_r | 0.501336 | 0.989249 | 0.958566 | 1.020914 |
| ethnicity_r | 0.000359 | 0.888709 | 0.832944 | 0.948207 |
| ethnicity_r | 0.198316 | 1.143931 | 0.932003 | 1.404049 |
| ethnicity_r | 0.371218 | 1.125781 | 0.868303 | 1.459608 |
| ethnicity_r | 0.045373 | 1.202922 | 1.003809 | 1.441531 |
| ethnicity_r | 0.315173 | 0.910134 | 0.757366 | 1.093718 |
| ethnicity_r | 0.009828 | 0.925812 | 0.87319  | 0.981606 |
| ethnicity_r | 6.78E-05 | 1.158598 | 1.07765  | 1.245626 |
| ethnicity_r | 0        | 0.676144 | 0.628393 | 0.727524 |
| ethnicity_r | 0.007212 | 0.925625 | 0.874884 | 0.979309 |
| ethnicity_r | 0.010528 | 0.490929 | 0.284622 | 0.846775 |
| ethnicity_r | 0.264593 | 0.892038 | 0.729813 | 1.090323 |
| ethnicity_r | 0.037992 | 1.23316  | 1.011677 | 1.503131 |
| ethnicity_r | 1.34E-07 | 3.453598 | 2.178712 | 5.474493 |
| ethnicity_r | 0.165776 | 1.100902 | 0.960961 | 1.261223 |
| ethnicity_r | 0.049116 | 1.600783 | 1.001816 | 2.557862 |
| ethnicity_r | 0.305516 | 0.957633 | 0.88153  | 1.040307 |
| ethnicity_r | 5.26E-05 | 1.540606 | 1.249445 | 1.899616 |
| ethnicity_r | 0.028718 | 2.451814 | 1.097695 | 5.476378 |
| ethnicity_r | 0.003637 | 2.088452 | 1.271348 | 3.430715 |
| ethnicity_r | 1.01E-07 | 1.401745 | 1.237879 | 1.587303 |
| ethnicity_r | 0.02473  | 2.176363 | 1.103957 | 4.290525 |
| ethnicity_r | 0.039819 | 0.940875 | 0.88776  | 0.997169 |
| ethnicity_r | 0.847506 | 1.021857 | 0.81975  | 1.273794 |
| ethnicity_r | 0.001235 | 0.922123 | 0.877863 | 0.968615 |
| ethnicity_r | 0.000139 | 0.708914 | 0.593925 | 0.846166 |
| ethnicity_r | 0.175979 | 0.575269 | 0.25827  | 1.28135  |
| ethnicity_r | 0.037706 | 1.493904 | 1.023061 | 2.181443 |
| ethnicity_r | 0.721264 | 0.922559 | 0.592489 | 1.436507 |
| ethnicity_r | 0.628229 | 0.753426 | 0.239516 | 2.369997 |
| ethnicity_r | 0.522118 | 1.021975 | 0.956166 | 1.092313 |
| ethnicity_r | 0.358667 | 1.180509 | 0.828286 | 1.682511 |
| ethnicity_r | 0.27035  | 0.949397 | 0.865658 | 1.041236 |
| ethnicity_r | 0        | 0.738415 | 0.699545 | 0.779445 |
| ethnicity_r | 0.798011 | 0.922163 | 0.495776 | 1.715262 |
| ethnicity_r | 0.111968 | 1.420262 | 0.921454 | 2.18909  |
| ethnicity_r | 0.674841 | 1.124253 | 0.650464 | 1.943145 |
| ethnicity_r | 0.484596 | 1.204538 | 0.714787 | 2.029855 |
| ethnicity_r | 0.06926  | 1.276781 | 0.980914 | 1.661887 |
| ethnicity_r | 0.566673 | 0.662256 | 0.161727 | 2.711867 |
| ethnicity_r | 0.106534 | 0.766786 | 0.555422 | 1.058584 |
| ethnicity_r | 0.472691 | 0.909392 | 0.701724 | 1.178517 |

|             |          |          |          |          |
|-------------|----------|----------|----------|----------|
| ethnicity_r | 0.472293 | 1.293589 | 0.641112 | 2.61011  |
| ethnicity_r | 0.391486 | 1.168495 | 0.818366 | 1.668423 |
| ethnicity_r | 0.869672 | 0.942766 | 0.46627  | 1.906207 |
| ethnicity_€ | 0.086495 | 1.043577 | 0.993902 | 1.095734 |
| ethnicity_€ | 5.07E-08 | 1.275475 | 1.168587 | 1.392139 |
| ethnicity_€ | 0.065917 | 0.954385 | 0.908056 | 1.003077 |
| ethnicity_€ | 0.056546 | 1.0885   | 0.997637 | 1.187638 |
| ethnicity_€ | 2.08E-06 | 1.128907 | 1.073762 | 1.186885 |
| ethnicity_€ | 2.33E-06 | 1.23952  | 1.133827 | 1.355065 |
| ethnicity_€ | 0.484375 | 1.024038 | 0.958079 | 1.094538 |
| ethnicity_€ | 0.002938 | 1.204079 | 1.065372 | 1.360844 |
| ethnicity_€ | 0.000474 | 1.09249  | 1.039615 | 1.148054 |
| ethnicity_€ | 4.00E-06 | 1.235599 | 1.129339 | 1.351858 |
| ethnicity_€ | 3.83E-05 | 0.832051 | 0.762322 | 0.90816  |
| ethnicity_€ | 0.566918 | 1.036579 | 0.916631 | 1.172223 |
| ethnicity_€ | 0.852067 | 1.01716  | 0.850599 | 1.216336 |
| ethnicity_€ | 0.217669 | 1.23648  | 0.882297 | 1.732843 |
| ethnicity_€ | 0.333584 | 0.973864 | 0.922962 | 1.027573 |
| ethnicity_€ | 0.178481 | 0.929831 | 0.836327 | 1.033789 |
| ethnicity_€ | 0.201797 | 0.965491 | 0.914807 | 1.018984 |
| ethnicity_€ | 0.00912  | 1.126927 | 1.030118 | 1.232834 |
