# Supplementary material for: Inequalities in SARS-CoV-2 case rates by ethnicity, religion, measures of socioeconomic position, English proficiency, and self-reported disability: cohort study of 39 million people in England during the alpha and delta waves
Source: PubMed Central journal article supplement (PMC10568121; doi:10.1136/bmjmed-2022-000187), 2023-04-03
Supplement: bmjmed-2022-000187supp003.pdf [file bmjmed-2022-000187supp003.pdf]

| term        | p.value  | rr       | lower_ci | upper_ci |
|-------------|----------|----------|----------|----------|
| (Intercept) | 0        | 2.90E-09 | 7.68E-11 | 1.09E-07 |
| age_1_1     | 7.20E-12 | 11.90247 | 5.86177  | 24.16826 |
| age_1_2     | 5.39E-11 | 4.347023 | 2.802245 | 6.743382 |
| age_1_3     | 1.93E-10 | 2.766115 | 2.022258 | 3.783587 |
| age_1_4     | 4.58E-07 | 1.873146 | 1.467695 | 2.390604 |
| age_1_5     | 3.03E-13 | 2.112172 | 1.727659 | 2.582264 |
| age_1_6     | 6.15E-12 | 1.843835 | 1.548747 | 2.195146 |
| age_1_7     | 1.67E-12 | 1.807762 | 1.533718 | 2.130772 |
| age_1_8     | 1.78E-11 | 1.93905  | 1.598629 | 2.351962 |
| age_1_9     | 0.07641  | 1.312311 | 0.971561 | 1.772571 |
| age_2_1     | 2.13E-12 | 0.846863 | 0.808491 | 0.887057 |
| age_2_2     | 8.27E-12 | 0.940801 | 0.924479 | 0.957412 |
| age_2_3     | 1.92E-11 | 0.969643 | 0.960953 | 0.978411 |
| age_2_4     | 0.000185 | 0.989584 | 0.984167 | 0.995031 |
| age_2_5     | 6.66E-16 | 0.984576 | 0.980869 | 0.988298 |
| age_2_6     | 1.13E-12 | 0.989327 | 0.986407 | 0.992256 |
| age_2_7     | 4.03E-12 | 0.990085 | 0.987301 | 0.992877 |
| age_2_8     | 8.71E-10 | 0.98842  | 0.984747 | 0.992107 |
| age_2_9     | 0.346866 | 0.997129 | 0.991172 | 1.003121 |
| age_3_1     | 5.77E-12 | 1.003562 | 1.002547 | 1.004579 |
| age_3_2     | 3.63E-12 | 1.000818 | 1.000587 | 1.001048 |
| age_3_3     | 1.46E-12 | 1.000311 | 1.000225 | 1.000398 |
| age_3_4     | 0.026168 | 1.000047 | 1.000006 | 1.000088 |
| age_3_5     | 2.22E-16 | 1.0001   | 1.000076 | 1.000124 |
| age_3_6     | 4.75E-11 | 1.000058 | 1.000041 | 1.000075 |
| age_3_7     | 6.33E-10 | 1.000051 | 1.000035 | 1.000067 |
| age_3_8     | 1.18E-08 | 1.000061 | 1.00004  | 1.000082 |
| age_3_9     | 0.47003  | 1.000012 | 0.99998  | 1.000043 |
| sex_1       | 0        | 0.938853 | 0.935454 | 0.942265 |
| region_1    | 0        | 1.270785 | 1.260188 | 1.281471 |
| region_2    | 0        | 1.105559 | 1.098522 | 1.112641 |
| region_3    | 0        | 1.158034 | 1.150015 | 1.166109 |
| region_4    | 0        | 1.1942   | 1.187008 | 1.201435 |
| region_5    | 0        | 1.386726 | 1.374282 | 1.399283 |
| region_6    | 0        | 0.902354 | 0.895533 | 0.909227 |
| region_7    | 0.227176 | 1.005134 | 0.996815 | 1.013524 |
| region_8    | 0        | 1.179561 | 1.168897 | 1.190322 |
| ruralurban  | 0        | 1.088857 | 1.079073 | 1.09873  |
| ruralurban  | 0        | 1.164008 | 1.155058 | 1.173028 |
| ruralurban  | 0        | 1.162378 | 1.154192 | 1.170622 |
| bmi_categ   | 0        | 1.257873 | 1.241258 | 1.274711 |
| bmi_categ   | 0        | 1.17807  | 1.162629 | 1.193716 |
| bmi_categ   | 0        | 1.273559 | 1.256673 | 1.290671 |
| health_cor  | 0        | 1.014768 | 1.012414 | 1.017127 |
| learning_c  | 0        | 1.589124 | 1.555621 | 1.623348 |
| ethnicity_1 | 0        | 0.926676 | 0.914434 | 0.939082 |
| ethnicity_2 | 0.003579 | 0.826893 | 0.727625 | 0.939705 |
| ethnicity_3 | 0        | 0.784029 | 0.765289 | 0.803229 |
| ethnicity_4 | 0.235217 | 0.988981 | 0.971051 | 1.007242 |

|             |          |          |          |          |
|-------------|----------|----------|----------|----------|
| ethnicity_£ | 0        | 0.734739 | 0.706643 | 0.763951 |
| ethnicity_£ | 0        | 0.586629 | 0.546854 | 0.629297 |
| ethnicity_£ | 2.81E-07 | 0.952425 | 0.934871 | 0.970309 |
| ethnicity_£ | 0        | 0.687685 | 0.674432 | 0.701198 |
| ethnicity_£ | 0.616538 | 1.077627 | 0.804239 | 1.443949 |
| imd_quint   | 0.319017 | 0.997217 | 0.991765 | 1.002699 |
| imd_quint   | 6.96E-05 | 0.988708 | 0.983191 | 0.994256 |
| imd_quint   | 7.33E-06 | 0.986998 | 0.981368 | 0.992661 |
| imd_quint   | 0        | 0.968471 | 0.962502 | 0.974476 |
| religion_1  | 0.441105 | 0.929164 | 0.770738 | 1.120154 |
| religion_2  | 0        | 0.883352 | 0.875835 | 0.890934 |
| religion_3  | 0        | 0.797662 | 0.772755 | 0.823373 |
| religion_4  | 0        | 0.947075 | 0.942963 | 0.951206 |
| religion_5  | 2.32E-07 | 0.870327 | 0.825702 | 0.917364 |
| religion_6  | 0.211605 | 1.017841 | 0.989988 | 1.046478 |
| religion_7  | 0.513422 | 0.941599 | 0.786116 | 1.127835 |
| religion_8  | 1.71E-13 | 0.830404 | 0.79036  | 0.872476 |
| education_  | 0        | 1.063067 | 1.051603 | 1.074655 |
| education_  | 6.60E-10 | 1.067518 | 1.045609 | 1.089887 |
| education_  | 0        | 1.163839 | 1.155994 | 1.171737 |
| education_  | 0        | 1.156164 | 1.147524 | 1.16487  |
| education_  | 0        | 1.121812 | 1.113861 | 1.129819 |
| education_  | 0        | 1.098605 | 1.090629 | 1.10664  |
| education_  | 0        | 1.191724 | 1.17726  | 1.206365 |
| tenure_1    | 0        | 0.92606  | 0.920919 | 0.931231 |
| tenure_2    | 0        | 0.914186 | 0.909461 | 0.918936 |
| tenure_3    | 0        | 0.9252   | 0.91215  | 0.938437 |
| tenure_4    | 0        | 0.768347 | 0.753419 | 0.78357  |
| care_home   | 0        | 1.32406  | 1.277118 | 1.372726 |
| english_lar | 2.98E-08 | 0.865362 | 0.822224 | 0.910763 |
| english_lar | 1.20E-07 | 0.749105 | 0.673121 | 0.833667 |
| ethnicity_r | 0.469634 | 0.856115 | 0.56189  | 1.304407 |
| ethnicity_r | 0.227611 | 0.978495 | 0.944541 | 1.013669 |
| ethnicity_r | 0.164071 | 1.088653 | 0.965893 | 1.227016 |
| ethnicity_r | 2.55E-08 | 0.939793 | 0.91948  | 0.960555 |
| ethnicity_r | 0.009405 | 0.91664  | 0.85836  | 0.978877 |
| ethnicity_r | 0.233392 | 0.956488 | 0.889    | 1.029099 |
| ethnicity_r | 0.38978  | 0.876105 | 0.648097 | 1.184329 |
| ethnicity_r | 0.862937 | 1.012931 | 0.875451 | 1.172    |
| ethnicity_r | 0.04706  | 1.41744  | 1.004535 | 2.000065 |
| ethnicity_r | 0.681939 | 0.970594 | 0.84148  | 1.119519 |
| ethnicity_r | 0.459414 | 0.752775 | 0.354742 | 1.597417 |
| ethnicity_r | 0.731275 | 0.96751  | 0.801289 | 1.168212 |
| ethnicity_r | 0.781903 | 0.98063  | 0.853811 | 1.126285 |
| ethnicity_r | 0.363158 | 1.309166 | 0.732537 | 2.339699 |
| ethnicity_r | 0.566633 | 1.118745 | 0.762161 | 1.64216  |
| ethnicity_r | 0.617943 | 1.185141 | 0.607963 | 2.310271 |
| ethnicity_r | 0.011782 | 1.281056 | 1.056471 | 1.553384 |
| ethnicity_r | 6.25E-05 | 1.11933  | 1.059226 | 1.182845 |
| ethnicity_r | 0.001984 | 1.279224 | 1.094376 | 1.495293 |

|             |          |          |          |          |
|-------------|----------|----------|----------|----------|
| ethnicity_r | 0.728091 | 0.991483 | 0.944805 | 1.040466 |
| ethnicity_r | 6.43E-06 | 1.151215 | 1.082903 | 1.223837 |
| ethnicity_r | 0.760327 | 0.977658 | 0.845545 | 1.130413 |
| ethnicity_r | 0.509761 | 1.064241 | 0.884389 | 1.280667 |
| ethnicity_r | 0.09635  | 1.064582 | 0.988877 | 1.146082 |
| ethnicity_r | 0.645881 | 0.930836 | 0.685645 | 1.26371  |
| ethnicity_r | 0.935265 | 1.002104 | 0.952545 | 1.054242 |
| ethnicity_r | 0.478775 | 0.93955  | 0.790644 | 1.1165   |
| ethnicity_r | 0.080833 | 1.025568 | 0.996908 | 1.055051 |
| ethnicity_r | 0.241824 | 0.955083 | 0.884339 | 1.031487 |
| ethnicity_r | 0.653239 | 1.048582 | 0.852552 | 1.289686 |
| ethnicity_r | 0.748137 | 0.959811 | 0.747217 | 1.232892 |
| ethnicity_r | 0.901381 | 1.010679 | 0.854374 | 1.195579 |
| ethnicity_r | 0.015987 | 1.266263 | 1.045001 | 1.534375 |
| ethnicity_r | 4.05E-07 | 1.195404 | 1.115651 | 1.280859 |
| ethnicity_r | 5.41E-07 | 1.239978 | 1.139924 | 1.348813 |
| ethnicity_r | 0.001855 | 1.122822 | 1.043828 | 1.207793 |
| ethnicity_r | 3.81E-05 | 1.163159 | 1.08244  | 1.249898 |
| ethnicity_r | 0.903399 | 1.034366 | 0.599375 | 1.785046 |
| ethnicity_r | 0.017994 | 1.250307 | 1.039057 | 1.504507 |
| ethnicity_r | 0.000575 | 1.469751 | 1.180442 | 1.829965 |
| ethnicity_r | 0.725087 | 1.175027 | 0.478235 | 2.88705  |
| ethnicity_r | 0.520784 | 1.045779 | 0.912227 | 1.198884 |
| ethnicity_r | 0.963166 | 1.013538 | 0.57277  | 1.793495 |
| ethnicity_r | 0.058026 | 0.924832 | 0.853043 | 1.002663 |
| ethnicity_r | 0.000104 | 1.662164 | 1.285924 | 2.148484 |
| ethnicity_r | 0.999714 | 3.34E-11 | 0        | Inf      |
| ethnicity_r | 0.467309 | 1.259354 | 0.676236 | 2.345292 |
| ethnicity_r | 0.004081 | 1.19469  | 1.058107 | 1.348904 |
| ethnicity_r | 0.552021 | 1.353734 | 0.498946 | 3.672935 |
| ethnicity_r | 0.045029 | 1.061786 | 1.001328 | 1.125895 |
| ethnicity_r | 0.005725 | 1.314274 | 1.082674 | 1.595417 |
| ethnicity_r | 0.027233 | 0.946011 | 0.900537 | 0.993782 |
| ethnicity_r | 0.599848 | 0.948486 | 0.778427 | 1.155697 |
| ethnicity_r | 0.180732 | 0.549347 | 0.228506 | 1.32067  |
| ethnicity_r | 0.713929 | 1.084139 | 0.70388  | 1.669825 |
| ethnicity_r | 0.764755 | 0.937716 | 0.61538  | 1.428892 |
| ethnicity_r | 0.968012 | 1.029029 | 0.254112 | 4.167059 |
| ethnicity_r | 0.007862 | 1.112568 | 1.028406 | 1.203617 |
| ethnicity_r | 0.50785  | 1.15224  | 0.7575   | 1.752683 |
| ethnicity_r | 0.557652 | 1.031191 | 0.930569 | 1.142695 |
| ethnicity_r | 7.70E-08 | 1.199473 | 1.122488 | 1.281738 |
| ethnicity_r | 0.897136 | 0.948548 | 0.425854 | 2.112797 |
| ethnicity_r | 0.755846 | 1.095171 | 0.61746  | 1.942474 |
| ethnicity_r | 0.996203 | 0.99841  | 0.518391 | 1.922914 |
| ethnicity_r | 0.091018 | 0.443587 | 0.172811 | 1.138643 |
| ethnicity_r | 0.028888 | 0.708114 | 0.519569 | 0.965081 |
| ethnicity_r | 0.999758 | 1.76E-11 | 0        | Inf      |
| ethnicity_r | 0.059937 | 0.708713 | 0.495088 | 1.014516 |
| ethnicity_r | 0.252955 | 0.840624 | 0.624213 | 1.132064 |

|             |          |          |          |          |
|-------------|----------|----------|----------|----------|
| ethnicity_r | 0.686112 | 0.80982  | 0.29113  | 2.252628 |
| ethnicity_r | 0.919643 | 1.020156 | 0.692294 | 1.503289 |
| ethnicity_r | 0.193435 | 0.541208 | 0.21454  | 1.365272 |
| ethnicity_€ | 0.001349 | 1.091908 | 1.034752 | 1.152221 |
| ethnicity_€ | 0.045385 | 1.121209 | 1.002351 | 1.254162 |
| ethnicity_€ | 0.004123 | 1.090323 | 1.027769 | 1.156685 |
| ethnicity_€ | 0.000122 | 1.255242 | 1.117827 | 1.409548 |
| ethnicity_€ | 0.070516 | 1.054081 | 0.9956   | 1.115996 |
| ethnicity_€ | 0.010359 | 1.165156 | 1.036645 | 1.309599 |
| ethnicity_€ | 0.063351 | 0.931192 | 0.863688 | 1.003973 |
| ethnicity_€ | 0.924274 | 1.007995 | 0.855355 | 1.187873 |
| ethnicity_€ | 7.14E-07 | 1.154058 | 1.0905   | 1.221321 |
| ethnicity_€ | 9.58E-07 | 1.350667 | 1.197647 | 1.523238 |
| ethnicity_€ | 0.017043 | 0.897026 | 0.820413 | 0.980793 |
| ethnicity_€ | 0.092257 | 0.875381 | 0.749731 | 1.02209  |
| ethnicity_€ | 0.258067 | 0.886249 | 0.7189   | 1.092554 |
| ethnicity_€ | 0.625226 | 0.875174 | 0.512555 | 1.494336 |
| ethnicity_€ | 0.857761 | 1.005744 | 0.944683 | 1.070751 |
| ethnicity_€ | 0.35788  | 1.067558 | 0.928681 | 1.227202 |
| ethnicity_€ | 0.015508 | 1.085435 | 1.015713 | 1.159943 |
| ethnicity_€ | 0.008229 | 1.177455 | 1.043094 | 1.329123 |
