# Supplementary material for: Inequalities in SARS-CoV-2 case rates by ethnicity, religion, measures of socioeconomic position, English proficiency, and self-reported disability: cohort study of 39 million people in England during the alpha and delta waves
Source: PubMed Central journal article supplement (PMC10568121; doi:10.1136/bmjmed-2022-000187), 2023-04-03
Supplement: bmjmed-2022-000187supp004.pdf [file bmjmed-2022-000187supp004.pdf]

| term                    | level                      | estimate  | std.error | statistic |
|-------------------------|----------------------------|-----------|-----------|-----------|
| (Intercept)             |                            | -12.31616 | 0.399649  | -30.81745 |
| age_1_1                 |                            | 0.565978  | 0.080096  | 7.066219  |
| age_1_2                 |                            | 0.516851  | 0.049188  | 10.50758  |
| age_1_3                 |                            | 0.312907  | 0.035278  | 8.869803  |
| age_1_4                 |                            | 0.244443  | 0.02834   | 8.625275  |
| age_1_5                 |                            | 0.129831  | 0.02471   | 5.25422   |
| age_1_6                 |                            | 0.188637  | 0.026301  | 7.172341  |
| age_1_7                 |                            | 0.507724  | 0.033251  | 15.26935  |
| age_1_8                 |                            | -0.056029 | 0.039964  | -1.402006 |
| age_1_9                 |                            | -0.338157 | 0.059095  | -5.722279 |
| age_2_1                 |                            | -0.038775 | 0.005248  | -7.388445 |
| age_2_2                 |                            | -0.022791 | 0.002012  | -11.32605 |
| age_2_3                 |                            | -0.009121 | 0.001077  | -8.466126 |
| age_2_4                 |                            | -0.005625 | 0.000727  | -7.735279 |
| age_2_5                 |                            | -0.000974 | 0.000578  | -1.685432 |
| age_2_6                 |                            | -0.002615 | 0.000644  | -4.059738 |
| age_2_7                 |                            | -0.012384 | 0.000807  | -15.34635 |
| age_2_8                 |                            | 0.001765  | 0.000896  | 1.970882  |
| age_2_9                 |                            | 0.007955  | 0.001227  | 6.483868  |
| age_3_1                 |                            | 0.001021  | 0.000113  | 9.047022  |
| age_3_2                 |                            | 0.000317  | 2.74E-05  | 11.58251  |
| age_3_3                 |                            | 8.72E-05  | 1.12E-05  | 7.779684  |
| age_3_4                 |                            | 4.24E-05  | 6.39E-06  | 6.639105  |
| age_3_5                 |                            | -4.89E-06 | 4.51E-06  | -1.084977 |
| age_3_6                 |                            | 6.15E-06  | 4.69E-06  | 1.311341  |
| age_3_7                 |                            | 8.07E-05  | 5.28E-06  | 15.30282  |
| age_3_8                 |                            | -8.23E-06 | 5.22E-06  | -1.578602 |
| age_3_9                 |                            | -4.22E-05 | 6.45E-06  | -6.538634 |
| sex_1                   | Male                       | -0.121921 | 0.001317  | -92.58007 |
| region_1                | Yorkshire and The Humber   | 0.108939  | 0.002796  | 38.96568  |
| region_2                | West Midlands              | 0.069149  | 0.002683  | 25.77518  |
| region_3                | South West                 | -0.348635 | 0.003164  | -110.1754 |
| region_4                | North West                 | 0.186206  | 0.002526  | 73.72417  |
| region_5                | North East                 | 0.13736   | 0.00337   | 40.76037  |
| region_6                | London                     | 0.064694  | 0.002865  | 22.58089  |
| region_7                | East of England            | 0.069779  | 0.002678  | 26.05687  |
| region_8                | East Midlands              | 0.130761  | 0.002813  | 46.48772  |
| ruralurban_detailed_1   | Town and Fringe            | 0.140309  | 0.003613  | 38.83062  |
| ruralurban_detailed_2   | Major or minor conurbation | 0.378994  | 0.0031    | 122.2543  |
| ruralurban_detailed_3   | City and Town              | 0.257137  | 0.002887  | 89.07959  |
| bmi_category_Missing    |                            | 0.15173   | 0.006664  | 22.76731  |
| bmi_category_OVERWEIGHT |                            | 0.249216  | 0.006772  | 36.79966  |
| bmi_category_IDEAL      |                            | 0.11213   | 0.006764  | 16.57655  |
| bmi_category_OBESE      |                            | 0.357351  | 0.006776  | 52.74134  |
| health_condition        |                            | 0.073489  | 0.000845  | 86.99446  |
| learning_condition_No   |                            | 0.125686  | 0.006155  | 20.42178  |

|                       |                                 |   |           |          |           |
|-----------------------|---------------------------------|---|-----------|----------|-----------|
| ethnicity_1           | White other                     |   | -0.04973  | 0.005069 | -9.811092 |
| ethnicity_2           | Pakistani                       |   | 0.473209  | 0.035432 | 13.35531  |
| ethnicity_3           | Other                           |   | 0.120225  | 0.007267 | 16.54332  |
| ethnicity_4           | Mixed                           |   | 0.017615  | 0.006284 | 2.803318  |
| ethnicity_5           | Indian                          |   | 0.359178  | 0.010888 | 32.98968  |
| ethnicity_6           | Chinese                         |   | -0.49423  | 0.027306 | -18.09964 |
| ethnicity_7           | Black Caribbean                 |   | -0.0338   | 0.006928 | -4.878378 |
| ethnicity_8           | Black African                   |   | -0.002219 | 0.006115 | -0.362949 |
| ethnicity_9           | Bangladeshi                     |   | 0.328227  | 0.098136 | 3.344615  |
| imd_quintile_1        |                                 | 4 | 0.06695   | 0.002168 | 30.87867  |
| imd_quintile_2        |                                 | 3 | 0.094138  | 0.002169 | 43.40493  |
| imd_quintile_3        |                                 | 2 | 0.129681  | 0.002178 | 59.54505  |
| imd_quintile_4        |                                 | 1 | 0.154544  | 0.00229  | 67.48769  |
| religion_1            | Sikh                            |   | 0.15521   | 0.06353  | 2.443118  |
| religion_2            | Religion Not Stated             |   | -0.142564 | 0.003226 | -44.18875 |
| religion_3            | Other Religion                  |   | -0.351516 | 0.014365 | -24.47062 |
| religion_4            | No religion                     |   | -0.115506 | 0.00172  | -67.13892 |
| religion_5            | Muslim                          |   | 0.253054  | 0.014862 | 17.027    |
| religion_6            | Jewish                          |   | 0.05058   | 0.010408 | 4.859861  |
| religion_7            | Hindu                           |   | -0.156713 | 0.071449 | -2.193342 |
| religion_8            | Buddhist                        |   | -0.342736 | 0.022921 | -14.95306 |
| education_1           | Other                           |   | 0.002911  | 0.003642 | 0.799113  |
| education_2           | Not classified                  |   | -0.00704  | 0.006415 | -1.097539 |
| education_3           | Level 4                         |   | -0.179316 | 0.002507 | -71.52863 |
| education_4           | Level 3                         |   | 0.000263  | 0.002804 | 0.093924  |
| education_5           | Level 2                         |   | 0.010307  | 0.002584 | 3.989523  |
| education_6           | Level 1                         |   | -0.000706 | 0.002638 | -0.267802 |
| education_7           | Apprenticeship                  |   | 0.053508  | 0.004542 | 11.77943  |
| tenure_1              | Social rented                   |   | -0.061785 | 0.00192  | -32.18265 |
| tenure_2              | Private rented                  |   | -0.101899 | 0.001963 | -51.90289 |
| tenure_3              | Other tenure                    |   | -0.072641 | 0.005175 | -14.03648 |
| tenure_4              | Not classified                  |   | -0.184517 | 0.006994 | -26.38351 |
| care_home_1           | Yes                             |   | 1.458451  | 0.005841 | 249.7124  |
| english_language_1    | Well or Very well               |   | 0.059444  | 0.016864 | 3.524979  |
| english_language_2    | Not well or Not at all          |   | -0.074098 | 0.02926  | -2.532413 |
| ethnicity_religion_1  | White other:Sikh                |   | 0.308509  | 0.110966 | 2.780223  |
| ethnicity_religion_2  | White other:Religion Not Stated |   | -0.057819 | 0.013289 | -4.350893 |
| ethnicity_religion_3  | White other:Other Religion      |   | -0.027189 | 0.054969 | -0.494626 |
| ethnicity_religion_4  | White other:No religion         |   | -0.178372 | 0.009219 | -19.34843 |
| ethnicity_religion_5  | White other:Muslim              |   | 0.042463  | 0.018435 | 2.303371  |
| ethnicity_religion_6  | White other:Jewish              |   | -0.076846 | 0.027982 | -2.746298 |
| ethnicity_religion_7  | White other:Hindu               |   | 0.294935  | 0.104074 | 2.833891  |
| ethnicity_religion_8  | White other:Buddhist            |   | -0.049531 | 0.066326 | -0.74678  |
| ethnicity_religion_9  | Pakistani:Sikh                  |   | -0.037447 | 0.100002 | -0.374461 |
| ethnicity_religion_10 | Pakistani:Religion Not Stated   |   | 0.062365  | 0.038433 | 1.622685  |
| ethnicity_religion_11 | Pakistani:Other Religion        |   | -0.101502 | 0.207661 | -0.488788 |
| ethnicity_religion_12 | Pakistani:No religion           |   | -0.307642 | 0.059262 | -5.191202 |
| ethnicity_religion_13 | Pakistani:Muslim                |   | -0.25008  | 0.038454 | -6.503302 |
| ethnicity_religion_14 | Pakistani:Jewish                |   | -0.347948 | 0.195943 | -1.775759 |

|                       |                                     |           |          |           |
|-----------------------|-------------------------------------|-----------|----------|-----------|
| ethnicity_religion_15 | Pakistani:Hindu                     | 0.064457  | 0.120901 | 0.533142  |
| ethnicity_religion_16 | Pakistani:Buddhist                  | -0.351434 | 0.246167 | -1.427623 |
| ethnicity_religion_17 | Other:Sikh                          | 0.26012   | 0.064749 | 4.01737   |
| ethnicity_religion_18 | Other:Religion Not Stated           | 0.005647  | 0.016924 | 0.333697  |
| ethnicity_religion_19 | Other:Other Religion                | 0.10738   | 0.056641 | 1.895791  |
| ethnicity_religion_20 | Other:No religion                   | -0.246669 | 0.017235 | -14.31208 |
| ethnicity_religion_21 | Other:Muslim                        | -0.211884 | 0.017263 | -12.27413 |
| ethnicity_religion_22 | Other:Jewish                        | -0.048242 | 0.044926 | -1.073816 |
| ethnicity_religion_23 | Other:Hindu                         | 0.209993  | 0.072449 | 2.898476  |
| ethnicity_religion_24 | Other:Buddhist                      | 0.177107  | 0.028397 | 6.236856  |
| ethnicity_religion_25 | Mixed:Sikh                          | 0.215302  | 0.083599 | 2.57541   |
| ethnicity_religion_26 | Mixed:Religion Not Stated           | 0.020966  | 0.016626 | 1.261046  |
| ethnicity_religion_27 | Mixed:Other Religion                | 0.044908  | 0.067068 | 0.669587  |
| ethnicity_religion_28 | Mixed:No religion                   | 0.006317  | 0.01     | 0.631706  |
| ethnicity_religion_29 | Mixed:Muslim                        | -0.087426 | 0.020985 | -4.166027 |
| ethnicity_religion_30 | Mixed:Jewish                        | 0.012592  | 0.076755 | 0.16406   |
| ethnicity_religion_31 | Mixed:Hindu                         | 0.219704  | 0.086616 | 2.536513  |
| ethnicity_religion_32 | Mixed:Buddhist                      | 0.147187  | 0.059434 | 2.476474  |
| ethnicity_religion_33 | Indian:Sikh                         | -0.073756 | 0.064688 | -1.140194 |
| ethnicity_religion_34 | Indian:Religion Not Stated          | -0.04508  | 0.020421 | -2.207526 |
| ethnicity_religion_35 | Indian:Other Religion               | 0.213003  | 0.027582 | 7.722609  |
| ethnicity_religion_36 | Indian:No religion                  | -0.377478 | 0.027086 | -13.93611 |
| ethnicity_religion_37 | Indian:Muslim                       | -0.072978 | 0.019554 | -3.732099 |
| ethnicity_religion_38 | Indian:Jewish                       | -0.447381 | 0.189565 | -2.360037 |
| ethnicity_religion_39 | Indian:Hindu                        | -0.043772 | 0.07241  | -0.604506 |
| ethnicity_religion_40 | Indian:Buddhist                     | 0.063467  | 0.08053  | 0.788115  |
| ethnicity_religion_41 | Chinese:Sikh                        | 1.138807  | 0.187223 | 6.082633  |
| ethnicity_religion_42 | Chinese:Religion Not Stated         | 0.065515  | 0.051228 | 1.278885  |
| ethnicity_religion_43 | Chinese:Other Religion              | 0.338276  | 0.194763 | 1.736855  |
| ethnicity_religion_44 | Chinese:No religion                 | -0.022485 | 0.03122  | -0.720189 |
| ethnicity_religion_45 | Chinese:Muslim                      | 0.473587  | 0.081609 | 5.803131  |
| ethnicity_religion_46 | Chinese:Jewish                      | 0.635673  | 0.379018 | 1.677155  |
| ethnicity_religion_47 | Chinese:Hindu                       | 0.670459  | 0.210432 | 3.186114  |
| ethnicity_religion_48 | Chinese:Buddhist                    | 0.349102  | 0.047454 | 7.356663  |
| ethnicity_religion_49 | Black Caribbean:Sikh                | 0.674126  | 0.285104 | 2.364494  |
| ethnicity_religion_50 | Black Caribbean:Religion Not Stated | -0.037867 | 0.022643 | -1.672345 |
| ethnicity_religion_51 | Black Caribbean:Other Religion      | -0.04897  | 0.092285 | -0.530633 |
| ethnicity_religion_52 | Black Caribbean:No religion         | -0.072305 | 0.019359 | -3.735004 |
| ethnicity_religion_53 | Black Caribbean:Muslim              | -0.25392  | 0.063494 | -3.999107 |
| ethnicity_religion_54 | Black Caribbean:Jewish              | -0.843187 | 0.378172 | -2.229636 |
| ethnicity_religion_55 | Black Caribbean:Hindu               | 0.474025  | 0.150648 | 3.146573  |
| ethnicity_religion_56 | Black Caribbean:Buddhist            | 0.041951  | 0.170724 | 0.245722  |
| ethnicity_religion_57 | Black African:Sikh                  | 0.081192  | 0.322603 | 0.251679  |
| ethnicity_religion_58 | Black African:Religion Not Stated   | -0.001279 | 0.023737 | -0.053875 |
| ethnicity_religion_59 | Black African:Other Religion        | -0.015306 | 0.151535 | -0.101004 |
| ethnicity_religion_60 | Black African:No religion           | -0.054877 | 0.036228 | -1.514775 |
| ethnicity_religion_61 | Black African:Muslim                | -0.330072 | 0.018843 | -17.5173  |
| ethnicity_religion_62 | Black African:Jewish                | 0.04197   | 0.223914 | 0.187439  |
| ethnicity_religion_63 | Black African:Hindu                 | 0.349612  | 0.175432 | 1.992859  |

|                       |                               |           |          |           |
|-----------------------|-------------------------------|-----------|----------|-----------|
| ethnicity_religion_64 | Black African:Buddhist        | 0.183019  | 0.224843 | 0.813986  |
| ethnicity_religion_65 | Bangladeshi:Sikh              | 0.263222  | 0.179369 | 1.467487  |
| ethnicity_religion_66 | Bangladeshi:Religion Not St   | 0.20453   | 0.101051 | 2.024022  |
| ethnicity_religion_67 | Bangladeshi:Other Religion    | -0.960636 | 0.714019 | -1.345393 |
| ethnicity_religion_68 | Bangladeshi:No religion       | -0.210599 | 0.123082 | -1.711053 |
| ethnicity_religion_69 | Bangladeshi:Muslim            | -0.087278 | 0.099316 | -0.878785 |
| ethnicity_religion_70 | Bangladeshi:Jewish            | 0.205392  | 0.268747 | 0.764255  |
| ethnicity_religion_71 | Bangladeshi:Hindu             | 0.202493  | 0.135703 | 1.49218   |
| ethnicity_religion_72 | Bangladeshi:Buddhist          | -0.348157 | 0.295076 | -1.179887 |
| ethnicity_english_1   | White other:Well or Very we   | 0.018612  | 0.018001 | 1.033947  |
| ethnicity_english_2   | White other:Not well or Not   | 0.171795  | 0.030933 | 5.553804  |
| ethnicity_english_3   | Pakistani:Well or Very well   | -0.012357 | 0.018248 | -0.677164 |
| ethnicity_english_4   | Pakistani:Not well or Not at  | 0.107679  | 0.031009 | 3.472517  |
| ethnicity_english_5   | Other:Well or Very well       | 0.124462  | 0.018356 | 6.780535  |
| ethnicity_english_6   | Other:Not well or Not at all  | 0.192631  | 0.031767 | 6.063791  |
| ethnicity_english_7   | Mixed:Well or Very well       | -0.00235  | 0.02424  | -0.096929 |
| ethnicity_english_8   | Mixed:Not well or Not at all  | 0.137359  | 0.044878 | 3.060736  |
| ethnicity_english_9   | Indian:Well or Very well      | 0.080342  | 0.018263 | 4.399305  |
| ethnicity_english_10  | Indian:Not well or Not at all | 0.190014  | 0.032044 | 5.929738  |
| ethnicity_english_11  | Chinese:Well or Very well     | -0.281015 | 0.033017 | -8.511317 |
| ethnicity_english_12  | Chinese:Not well or Not at a  | -0.03968  | 0.046209 | -0.858714 |
| ethnicity_english_13  | Black Caribbean:Well or Ver   | -0.071763 | 0.074533 | -0.962828 |
| ethnicity_english_14  | Black Caribbean:Not well or   | 0.145778  | 0.140596 | 1.036856  |
| ethnicity_english_15  | Black African:Well or Very w  | 0.058566  | 0.01997  | 2.932643  |
| ethnicity_english_16  | Black African:Not well or No  | -0.026838 | 0.039514 | -0.679192 |
| ethnicity_english_17  | Bangladeshi:Well or Very w    | -0.005305 | 0.019892 | -0.266674 |
| ethnicity_english_18  | Bangladeshi:Not well or Not   | 0.139027  | 0.032481 | 4.280264  |

| p.value  | Lower CI  | Upper CI  | Rate ratio | Rate ratio, lower CI | Rate ratio, upper CI |
|----------|-----------|-----------|------------|----------------------|----------------------|
|          | 0         | -13.09947 | -11.53285  | 4.48E-06             | 2.05E-06 9.80E-06    |
| 1.59E-12 | 0.408989  | 0.722966  | 1.761169   | 1.505295             | 2.060536             |
| 0        | 0.420442  | 0.61326   | 1.676739   | 1.522634             | 1.846441             |
| 0        | 0.243763  | 0.382051  | 1.367394   | 1.276041             | 1.465287             |
| 0        | 0.188896  | 0.29999   | 1.27691    | 1.207915             | 1.349845             |
| 1.49E-07 | 0.0814    | 0.178263  | 1.138636   | 1.084805             | 1.195139             |
| 7.37E-13 | 0.137088  | 0.240187  | 1.207603   | 1.146929             | 1.271487             |
| 0        | 0.442552  | 0.572896  | 1.661505   | 1.556674             | 1.773396             |
| 0.160914 | -0.134358 | 0.0223    | 0.945511   | 0.874277             | 1.02255              |
| 1.05E-08 | -0.453983 | -0.222331 | 0.713083   | 0.635094             | 0.80065              |
| 1.49E-13 | -0.049062 | -0.028489 | 0.961967   | 0.952122             | 0.971913             |
| 0        | -0.026735 | -0.018847 | 0.977467   | 0.973619             | 0.98133              |
| 0        | -0.011232 | -0.007009 | 0.990921   | 0.988831             | 0.993015             |
| 1.02E-14 | -0.00705  | -0.0042   | 0.994391   | 0.992974             | 0.995809             |
| 0.091905 | -0.002107 | 0.000159  | 0.999026   | 0.997895             | 1.000159             |
| 4.91E-05 | -0.003877 | -0.001352 | 0.997388   | 0.99613              | 0.998648             |
| 0        | -0.013966 | -0.010802 | 0.987692   | 0.986131             | 0.989256             |
| 0.048737 | 9.75E-06  | 0.003521  | 1.001767   | 1.00001              | 1.003527             |
| 8.94E-11 | 0.00555   | 0.01036   | 1.007987   | 1.005566             | 1.010414             |
| 0        | 0.0008    | 0.001242  | 1.001021   | 1.0008               | 1.001243             |
| 0        | 0.000263  | 0.000371  | 1.000317   | 1.000263             | 1.000371             |
| 7.11E-15 | 6.52E-05  | 0.000109  | 1.000087   | 1.000065             | 1.000109             |
| 3.16E-11 | 2.99E-05  | 5.49E-05  | 1.000042   | 1.00003              | 1.000055             |
| 0.277932 | -1.37E-05 | 3.94E-06  | 0.999995   | 0.999986             | 1.000004             |
| 0.189743 | -3.04E-06 | 1.53E-05  | 1.000006   | 0.999997             | 1.000015             |
| 0        | 7.04E-05  | 9.11E-05  | 1.000081   | 1.00007              | 1.000091             |
| 0.114427 | -1.85E-05 | 1.99E-06  | 0.999992   | 0.999982             | 1.000002             |
| 6.21E-11 | -5.49E-05 | -2.96E-05 | 0.999958   | 0.999945             | 0.99997              |
| 0        | -0.124503 | -0.11934  | 0.885218   | 0.882936             | 0.887506             |
| 0        | 0.10346   | 0.114419  | 1.115095   | 1.109001             | 1.121222             |
| 0        | 0.063891  | 0.074407  | 1.071596   | 1.065976             | 1.077245             |
| 0        | -0.354837 | -0.342433 | 0.705651   | 0.701288             | 0.710041             |
| 0        | 0.181256  | 0.191157  | 1.204671   | 1.198722             | 1.210649             |
| 0        | 0.130755  | 0.143965  | 1.147241   | 1.139688             | 1.154844             |
| 0        | 0.059079  | 0.070309  | 1.066833   | 1.060859             | 1.07284              |
| 0        | 0.064531  | 0.075028  | 1.072272   | 1.066658             | 1.077915             |
| 0        | 0.125248  | 0.136274  | 1.139696   | 1.13343              | 1.145996             |
| 0        | 0.133227  | 0.147391  | 1.150629   | 1.142509             | 1.158807             |
| 0        | 0.372918  | 0.38507   | 1.460814   | 1.451965             | 1.469717             |
| 0        | 0.25148   | 0.262795  | 1.293223   | 1.285927             | 1.30056              |
| 0        | 0.138668  | 0.164793  | 1.163846   | 1.148743             | 1.179149             |
| 0        | 0.235943  | 0.26249   | 1.283019   | 1.266102             | 1.300163             |
| 0        | 0.098872  | 0.125389  | 1.118659   | 1.103925             | 1.133589             |
| 0        | 0.344071  | 0.370631  | 1.429537   | 1.410678             | 1.448648             |
| 0        | 0.071834  | 0.075145  | 1.076257   | 1.074477             | 1.078041             |
| 0        | 0.113623  | 0.137749  | 1.133926   | 1.12033              | 1.147687             |

|          |           |           |          |          |          |
|----------|-----------|-----------|----------|----------|----------|
| 0        | -0.059665 | -0.039796 | 0.951486 | 0.94208  | 0.960986 |
| 0        | 0.403762  | 0.542656  | 1.605137 | 1.497447 | 1.720571 |
| 0        | 0.105981  | 0.134469  | 1.12775  | 1.111801 | 1.143929 |
| 0.005058 | 0.005299  | 0.029932  | 1.017771 | 1.005313 | 1.030384 |
| 0        | 0.337838  | 0.380518  | 1.432152 | 1.401914 | 1.463042 |
| 0        | -0.547749 | -0.44071  | 0.610041 | 0.57825  | 0.643579 |
| 1.07E-06 | -0.04738  | -0.02022  | 0.966765 | 0.953725 | 0.979983 |
| 0.716643 | -0.014204 | 0.009766  | 0.997783 | 0.985896 | 1.009814 |
| 0.000824 | 0.13588   | 0.520573  | 1.388504 | 1.145545 | 1.682992 |
| 0        | 0.0627    | 0.071199  | 1.069242 | 1.064708 | 1.073795 |
| 0        | 0.089887  | 0.098389  | 1.098711 | 1.094051 | 1.103392 |
| 0        | 0.125412  | 0.13395   | 1.138465 | 1.133616 | 1.143335 |
| 0        | 0.150056  | 0.159032  | 1.167125 | 1.161899 | 1.172376 |
| 0.014561 | 0.030692  | 0.279728  | 1.167903 | 1.031168 | 1.32277  |
| 0        | -0.148887 | -0.136241 | 0.867132 | 0.861666 | 0.872633 |
| 0        | -0.379671 | -0.323361 | 0.703621 | 0.684086 | 0.723713 |
| 0        | -0.118878 | -0.112134 | 0.890915 | 0.887916 | 0.893925 |
| 0        | 0.223925  | 0.282183  | 1.287953 | 1.250977 | 1.326022 |
| 1.17E-06 | 0.030181  | 0.070979  | 1.051881 | 1.030641 | 1.073559 |
| 0.028283 | -0.296753 | -0.016672 | 0.85495  | 0.743227 | 0.983466 |
| 0        | -0.38766  | -0.297811 | 0.709826 | 0.678643 | 0.742442 |
| 0.424225 | -0.004228 | 0.010049  | 1.002915 | 0.995781 | 1.0101   |
| 0.272406 | -0.019613 | 0.005532  | 0.992985 | 0.980578 | 1.005548 |
| 0        | -0.184229 | -0.174402 | 0.835842 | 0.831745 | 0.839959 |
| 0.925169 | -0.005232 | 0.005759  | 1.000263 | 0.994781 | 1.005776 |
| 6.62E-05 | 0.005243  | 0.015371  | 1.010361 | 1.005257 | 1.01549  |
| 0.788852 | -0.005876 | 0.004463  | 0.999294 | 0.994141 | 1.004473 |
| 0        | 0.044605  | 0.062411  | 1.054965 | 1.045614 | 1.0644   |
| 0        | -0.065548 | -0.058023 | 0.940085 | 0.936554 | 0.943629 |
| 0        | -0.105747 | -0.098051 | 0.903121 | 0.899652 | 0.906603 |
| 0        | -0.082784 | -0.062498 | 0.929935 | 0.92055  | 0.939415 |
| 0        | -0.198225 | -0.17081  | 0.831506 | 0.820185 | 0.842982 |
| 0        | 1.447003  | 1.469898  | 4.299293 | 4.250358 | 4.348792 |
| 0.000424 | 0.026391  | 0.092496  | 1.061246 | 1.026742 | 1.096909 |
| 0.011328 | -0.131447 | -0.016749 | 0.928581 | 0.876826 | 0.983391 |
| 0.005432 | 0.091017  | 0.526002  | 1.361394 | 1.095287 | 1.692153 |
| 1.36E-05 | -0.083866 | -0.031773 | 0.943821 | 0.919555 | 0.968727 |
| 0.620864 | -0.134929 | 0.08055   | 0.973177 | 0.873778 | 1.083883 |
| 0        | -0.196441 | -0.160303 | 0.836631 | 0.82165  | 0.851886 |
| 0.021258 | 0.00633   | 0.078595  | 1.043377 | 1.00635  | 1.081766 |
| 0.006027 | -0.131689 | -0.022002 | 0.926033 | 0.876613 | 0.978238 |
| 0.004598 | 0.090949  | 0.49892   | 1.343039 | 1.095214 | 1.646942 |
| 0.455196 | -0.179529 | 0.080467  | 0.951676 | 0.835664 | 1.083794 |
| 0.708062 | -0.233452 | 0.158558  | 0.963246 | 0.791796 | 1.171819 |
| 0.104657 | -0.012964 | 0.137694  | 1.064351 | 0.98712  | 1.147624 |
| 0.624992 | -0.508517 | 0.305513  | 0.903479 | 0.601387 | 1.357321 |
| 2.09E-07 | -0.423795 | -0.191488 | 0.735179 | 0.654558 | 0.82573  |
| 7.86E-11 | -0.325451 | -0.17471  | 0.778738 | 0.722202 | 0.839701 |
| 0.075773 | -0.731997 | 0.036101  | 0.706136 | 0.480948 | 1.03676  |

|          |           |           |          |          |          |
|----------|-----------|-----------|----------|----------|----------|
| 0.593935 | -0.172508 | 0.301423  | 1.06658  | 0.841551 | 1.351781 |
| 0.1534   | -0.833922 | 0.131054  | 0.703678 | 0.434342 | 1.140029 |
| 5.89E-05 | 0.133212  | 0.387028  | 1.297086 | 1.142492 | 1.472597 |
| 0.738608 | -0.027523 | 0.038818  | 1.005663 | 0.972852 | 1.039581 |
| 0.057988 | -0.003637 | 0.218398  | 1.113358 | 0.99637  | 1.244082 |
| 0        | -0.28045  | -0.212888 | 0.781399 | 0.755444 | 0.808246 |
| 0        | -0.245718 | -0.178049 | 0.809059 | 0.782142 | 0.836901 |
| 0.282905 | -0.136297 | 0.039813  | 0.952903 | 0.872583 | 1.040616 |
| 0.00375  | 0.067992  | 0.351994  | 1.233669 | 1.070357 | 1.4219   |
| 4.46E-10 | 0.121449  | 0.232765  | 1.193759 | 1.129132 | 1.262085 |
| 0.010012 | 0.051448  | 0.379155  | 1.240236 | 1.052794 | 1.46105  |
| 0.207292 | -0.011621 | 0.053553  | 1.021187 | 0.988447 | 1.055012 |
| 0.503121 | -0.086545 | 0.17636   | 1.045931 | 0.917094 | 1.192868 |
| 0.527579 | -0.013283 | 0.025917  | 1.006337 | 0.986805 | 1.026255 |
| 3.10E-05 | -0.128558 | -0.046295 | 0.916287 | 0.879363 | 0.954761 |
| 0.869684 | -0.137847 | 0.163032  | 1.012672 | 0.871232 | 1.177075 |
| 0.011196 | 0.049936  | 0.389472  | 1.245708 | 1.051203 | 1.476201 |
| 0.013269 | 0.030696  | 0.263678  | 1.158571 | 1.031172 | 1.30171  |
| 0.254205 | -0.200544 | 0.053031  | 0.928898 | 0.818285 | 1.054463 |
| 0.027277 | -0.085105 | -0.005055 | 0.955921 | 0.918416 | 0.994958 |
| 1.15E-14 | 0.158943  | 0.267063  | 1.237388 | 1.172271 | 1.306123 |
| 0        | -0.430568 | -0.324389 | 0.685588 | 0.65014  | 0.722969 |
| 0.00019  | -0.111304 | -0.034652 | 0.929621 | 0.894667 | 0.965942 |
| 0.018273 | -0.818929 | -0.075833 | 0.6393   | 0.440904 | 0.926971 |
| 0.545507 | -0.185695 | 0.098151  | 0.957172 | 0.830527 | 1.103129 |
| 0.43063  | -0.094372 | 0.221306  | 1.065524 | 0.909944 | 1.247705 |
| 1.18E-09 | 0.77185   | 1.505763  | 3.123039 | 2.163766 | 4.507591 |
| 0.200938 | -0.034892 | 0.165923  | 1.067709 | 0.965709 | 1.180482 |
| 0.082413 | -0.043461 | 0.720012  | 1.402527 | 0.95747  | 2.054458 |
| 0.471409 | -0.083677 | 0.038707  | 0.977766 | 0.919729 | 1.039466 |
| 6.51E-09 | 0.313633  | 0.63354   | 1.605743 | 1.368388 | 1.884269 |
| 0.093512 | -0.107203 | 1.378549  | 1.888292 | 0.898343 | 3.969138 |
| 0.001442 | 0.258013  | 1.082905  | 1.955135 | 1.294356 | 2.953246 |
| 1.89E-13 | 0.256093  | 0.442112  | 1.417794 | 1.291872 | 1.555989 |
| 0.018055 | 0.115323  | 1.232929  | 1.962317 | 1.122235 | 3.431265 |
| 0.094456 | -0.082246 | 0.006513  | 0.962841 | 0.921045 | 1.006535 |
| 0.595673 | -0.229849 | 0.131909  | 0.95221  | 0.794654 | 1.141005 |
| 0.000188 | -0.110248 | -0.034362 | 0.930247 | 0.895612 | 0.966222 |
| 6.36E-05 | -0.378368 | -0.129471 | 0.775754 | 0.684978 | 0.87856  |
| 0.025772 | -1.584405 | -0.101969 | 0.430337 | 0.20507  | 0.903058 |
| 0.001652 | 0.178755  | 0.769296  | 1.606448 | 1.195728 | 2.158246 |
| 0.805897 | -0.292669 | 0.37657   | 1.042843 | 0.746269 | 1.457278 |
| 0.801289 | -0.551109 | 0.713494  | 1.08458  | 0.57631  | 2.04111  |
| 0.957035 | -0.047803 | 0.045245  | 0.998722 | 0.953322 | 1.046284 |
| 0.919547 | -0.312314 | 0.281703  | 0.984811 | 0.731752 | 1.325384 |
| 0.129829 | -0.125883 | 0.016129  | 0.946602 | 0.881718 | 1.01626  |
| 0        | -0.367003 | -0.29314  | 0.718872 | 0.692808 | 0.745918 |
| 0.851317 | -0.396901 | 0.480842  | 1.042863 | 0.6724   | 1.617435 |
| 0.046277 | 0.005765  | 0.69346   | 1.418517 | 1.005781 | 2.000625 |

|          |           |           |          |          |          |
|----------|-----------|-----------|----------|----------|----------|
| 0.415653 | -0.257673 | 0.62371   | 1.200837 | 0.772848 | 1.865838 |
| 0.142244 | -0.088342 | 0.614787  | 1.301116 | 0.915448 | 1.849262 |
| 0.042968 | 0.00647   | 0.402591  | 1.226948 | 1.00649  | 1.495695 |
| 0.178498 | -2.360114 | 0.438841  | 0.382649 | 0.094409 | 1.550909 |
| 0.087071 | -0.45184  | 0.030641  | 0.810099 | 0.636456 | 1.031115 |
| 0.379518 | -0.281938 | 0.107382  | 0.916423 | 0.754321 | 1.11336  |
| 0.444715 | -0.321353 | 0.732136  | 1.228006 | 0.725167 | 2.079519 |
| 0.135652 | -0.063485 | 0.468472  | 1.224452 | 0.938489 | 1.597551 |
| 0.238045 | -0.926506 | 0.230193  | 0.705988 | 0.395935 | 1.258843 |
| 0.301161 | -0.01667  | 0.053894  | 1.018786 | 0.983468 | 1.055372 |
| 2.80E-08 | 0.111167  | 0.232423  | 1.187434 | 1.117581 | 1.261654 |
| 0.498302 | -0.048124 | 0.02341   | 0.987719 | 0.953016 | 1.023686 |
| 0.000516 | 0.046902  | 0.168457  | 1.113691 | 1.048019 | 1.183477 |
| 1.20E-11 | 0.088485  | 0.160439  | 1.132539 | 1.092518 | 1.174027 |
| 1.33E-09 | 0.130367  | 0.254895  | 1.212435 | 1.139246 | 1.290326 |
| 0.922782 | -0.04986  | 0.045161  | 0.997653 | 0.951362 | 1.046196 |
| 0.002208 | 0.049399  | 0.225319  | 1.14724  | 1.050639 | 1.252723 |
| 1.09E-05 | 0.044548  | 0.116137  | 1.083658 | 1.045555 | 1.12315  |
| 3.03E-09 | 0.127207  | 0.252821  | 1.209266 | 1.135652 | 1.287652 |
| 0        | -0.345728 | -0.216302 | 0.755017 | 0.707705 | 0.805492 |
| 0.390498 | -0.13025  | 0.050889  | 0.961096 | 0.877876 | 1.052207 |
| 0.335634 | -0.217848 | 0.074323  | 0.930752 | 0.804247 | 1.077154 |
| 0.299803 | -0.12979  | 0.421346  | 1.156939 | 0.878279 | 1.524012 |
| 0.003361 | 0.019424  | 0.097708  | 1.060315 | 1.019614 | 1.10264  |
| 0.497016 | -0.104286 | 0.05061   | 0.973519 | 0.900968 | 1.051913 |
| 0.78972  | -0.044292 | 0.033683  | 0.994709 | 0.956674 | 1.034257 |
| 1.87E-05 | 0.075364  | 0.20269   | 1.149155 | 1.078277 | 1.224692 |
