# Supplementary material for: Inequalities in SARS-CoV-2 case rates by ethnicity, religion, measures of socioeconomic position, English proficiency, and self-reported disability: cohort study of 39 million people in England during the alpha and delta waves
Source: PubMed Central journal article supplement (PMC10568121; doi:10.1136/bmjmed-2022-000187), 2023-04-03
Supplement: bmjmed-2022-000187supp005.pdf [file bmjmed-2022-000187supp005.pdf]

| term                         | level           | estimate  | std.error | statistic | p.value  | Lower CI    |
|------------------------------|-----------------|-----------|-----------|-----------|----------|-------------|
| (Intercept)                  |                 | -17.27719 | 0.317296  | -54.45136 |          | 0 -17.89909 |
| age_1_1                      |                 | 1.938695  | 0.06309   | 30.72914  |          | 0 1.815039  |
| age_1_2                      |                 | 1.190198  | 0.038853  | 30.6331   |          | 0 1.114046  |
| age_1_3                      |                 | 0.836834  | 0.028147  | 29.7308   |          | 0 0.781666  |
| age_1_4                      |                 | 0.485842  | 0.022655  | 21.44508  |          | 0 0.441438  |
| age_1_5                      |                 | 0.625906  | 0.020554  | 30.45235  |          | 0 0.585621  |
| age_1_6                      |                 | 0.517778  | 0.023406  | 22.12139  |          | 0 0.471902  |
| age_1_7                      |                 | 0.487616  | 0.033185  | 14.69399  |          | 0 0.422574  |
| age_1_8                      |                 | 0.53903   | 0.059243  | 9.098621  |          | 0 0.422913  |
| age_1_9                      |                 | 0.247599  | 0.107     | 2.314001  | 0.020668 | 0.037878    |
| age_2_1                      |                 | -0.120091 | 0.00412   | -29.15101 |          | 0 -0.128166 |
| age_2_2                      |                 | -0.049387 | 0.00159   | -31.05886 |          | 0 -0.052504 |
| age_2_3                      |                 | -0.025916 | 0.000871  | -29.76313 |          | 0 -0.027623 |
| age_2_4                      |                 | -0.007418 | 0.000589  | -12.59559 |          | 0 -0.008573 |
| age_2_5                      |                 | -0.013269 | 0.00051   | -25.99347 |          | 0 -0.01427  |
| age_2_6                      |                 | -0.009379 | 0.000607  | -15.46068 |          | 0 -0.010568 |
| age_2_7                      |                 | -0.008343 | 0.000838  | -9.957565 |          | 0 -0.009985 |
| age_2_8                      |                 | -0.009678 | 0.00138   | -7.0151   | 2.30E-12 | -0.012382   |
| age_2_9                      |                 | -0.00311  | 0.002251  | -1.381712 | 0.16706  | -0.007521   |
| age_3_1                      |                 | 0.002311  | 8.85E-05  | 26.10778  |          | 0 0.002138  |
| age_3_2                      |                 | 0.000658  | 2.18E-05  | 30.19865  |          | 0 0.000615  |
| age_3_3                      |                 | 0.000267  | 9.20E-06  | 29.03021  |          | 0 0.000249  |
| age_3_4                      |                 | 2.50E-05  | 5.23E-06  | 4.782926  | 1.73E-06 | 1.48E-05    |
| age_3_5                      |                 | 8.61E-05  | 4.12E-06  | 20.90914  |          | 0 7.80E-05  |
| age_3_6                      |                 | 5.12E-05  | 4.49E-06  | 11.40813  |          | 0 4.24E-05  |
| age_3_7                      |                 | 4.26E-05  | 5.54E-06  | 7.684878  | 1.53E-14 | 3.17E-05    |
| age_3_8                      |                 | 5.12E-05  | 8.11E-06  | 6.304387  | 2.89E-10 | 3.53E-05    |
| age_3_9                      |                 | 1.41E-05  | 1.19E-05  | 1.189298  | 0.234322 | -9.14E-06   |
| sex_1                        | Male            | -0.079654 | 0.001114  | -71.51281 |          | 0 -0.081837 |
| region_1                     | Yorkshire and T | 0.195598  | 0.002281  | 85.76864  |          | 0 0.191128  |
| region_2                     | West Midlands   | 0.080169  | 0.002262  | 35.4476   |          | 0 0.075736  |
| region_3                     | South West      | 0.140485  | 0.00218   | 64.42914  |          | 0 0.136211  |
| region_4                     | North West      | 0.132454  | 0.002137  | 61.96738  |          | 0 0.128264  |
| region_5                     | North East      | 0.270278  | 0.002716  | 99.51271  |          | 0 0.264955  |
| region_6                     | London          | -0.130113 | 0.002597  | -50.09148 |          | 0 -0.135204 |
| region_7                     | East of England | -0.008564 | 0.002212  | -3.870894 | 0.000108 | -0.012901   |
| region_8                     | East Midlands   | 0.149781  | 0.002297  | 65.21755  |          | 0 0.14528   |
| ruralurban_ Town and Fring   |                 | 0.076103  | 0.002665  | 28.55432  |          | 0 0.070879  |
| ruralurban_ Major or minor c |                 | 0.102496  | 0.002383  | 43.00473  |          | 0 0.097825  |
| ruralurban_ City and Town    |                 | 0.114246  | 0.002132  | 53.57909  |          | 0 0.110067  |
| bmi_category_Missing         |                 | 0.144449  | 0.006619  | 21.82315  |          | 0 0.131476  |
| bmi_category_OVERWEIG        |                 | 0.227598  | 0.00674   | 33.77054  |          | 0 0.214388  |
| bmi_category_IDEAL           |                 | 0.158105  | 0.006711  | 23.55949  |          | 0 0.144952  |
| bmi_category_OBESE           |                 | 0.240234  | 0.00676   | 35.53506  |          | 0 0.226984  |
| health_condition             |                 | 0.015614  | 0.000901  | 17.32053  |          | 0 0.013847  |
| learning_condition_No        |                 | 0.388887  | 0.005853  | 66.44492  |          | 0 0.377415  |

|              |                         |           |          |           |          |           |
|--------------|-------------------------|-----------|----------|-----------|----------|-----------|
| ethnicity_1  | White other             | -0.122717 | 0.004561 | -26.90724 | 0        | -0.131656 |
| ethnicity_2  | Pakistani               | -0.341839 | 0.045398 | -7.52981  | 5.08E-14 | -0.430819 |
| ethnicity_3  | Other                   | -0.304787 | 0.007665 | -39.7634  | 0        | -0.31981  |
| ethnicity_4  | Mixed                   | -0.063547 | 0.005076 | -12.51937 | 0        | -0.073496 |
| ethnicity_5  | Indian                  | -0.34792  | 0.012199 | -28.52043 | 0        | -0.37183  |
| ethnicity_6  | Chinese                 | -0.570873 | 0.023609 | -24.18037 | 0        | -0.617146 |
| ethnicity_7  | Black Caribbean         | -0.099737 | 0.006828 | -14.60719 | 0        | -0.113119 |
| ethnicity_8  | Black African           | -0.437605 | 0.00627  | -69.79885 | 0        | -0.449894 |
| ethnicity_9  | Bangladeshi             | -0.104    | 0.106101 | -0.980199 | 0.326988 | -0.311958 |
| imd Quintile | 4                       | -0.011613 | 0.001705 | -6.810477 | 9.73E-12 | -0.014955 |
| imd Quintile | 3                       | -0.022381 | 0.00174  | -12.8639  | 0        | -0.025792 |
| imd Quintile | 2                       | -0.031468 | 0.001793 | -17.54762 | 0        | -0.034983 |
| imd Quintile | 1                       | -0.066194 | 0.001931 | -34.27328 | 0        | -0.06998  |
| religion_1   | Sikh                    | -0.13295  | 0.059674 | -2.227923 | 0.025886 | -0.249912 |
| religion_2   | Religion Not Stated     | -0.103074 | 0.00256  | -40.26917 | 0        | -0.108091 |
| religion_3   | Other Religion          | -0.237833 | 0.011588 | -20.52374 | 0        | -0.260545 |
| religion_4   | No religion             | -0.045231 | 0.001331 | -33.97574 | 0        | -0.047841 |
| religion_5   | Muslim                  | -0.251791 | 0.015463 | -16.28383 | 0        | -0.282097 |
| religion_6   | Jewish                  | -0.066793 | 0.009642 | -6.927182 | 4.29E-12 | -0.085692 |
| religion_7   | Hindu                   | -0.100204 | 0.055919 | -1.791944 | 0.073142 | -0.209806 |
| religion_8   | Buddhist                | -0.203831 | 0.018085 | -11.27093 | 0        | -0.239277 |
| education_   | Other                   | 0.063637  | 0.004121 | 15.44286  | 0        | 0.055561  |
| education_   | Not classified          | 0.061561  | 0.006043 | 10.18759  | 0        | 0.049717  |
| education_   | Level 4                 | 0.129846  | 0.002514 | 51.65439  | 0        | 0.124919  |
| education_   | Level 3                 | 0.123322  | 0.002781 | 44.34313  | 0        | 0.117871  |
| education_   | Level 2                 | 0.099729  | 0.002634 | 37.86059  | 0        | 0.094566  |
| education_   | Level 1                 | 0.085399  | 0.00271  | 31.51755  | 0        | 0.080089  |
| education_   | Apprenticeship          | 0.152258  | 0.004455 | 34.17774  | 0        | 0.143526  |
| tenure_1     | Social rented           | -0.096497 | 0.001708 | -56.48038 | 0        | -0.099845 |
| tenure_2     | Private rented          | -0.100696 | 0.001603 | -62.82646 | 0        | -0.103837 |
| tenure_3     | Other tenure            | -0.076889 | 0.004495 | -17.10369 | 0        | -0.0857   |
| tenure_4     | Not classified          | -0.284669 | 0.007196 | -39.5592  | 0        | -0.298774 |
| care_home    | Yes                     | 0.27754   | 0.013721 | 20.22801  | 0        | 0.250648  |
| english_lang | Well or Very well       | -0.169181 | 0.016632 | -10.17191 | 0        | -0.20178  |
| english_lang | Not well or Not at all  | -0.391645 | 0.028273 | -13.85214 | 0        | -0.447061 |
| ethnicity_re | White other:Sikh        | -0.250638 | 0.143255 | -1.749598 | 0.080188 | -0.531417 |
| ethnicity_re | White other:Religious   | -0.039496 | 0.011487 | -3.438338 | 0.000585 | -0.06201  |
| ethnicity_re | White other:Other       | 0.039176  | 0.045656 | 0.858065  | 0.390856 | -0.05031  |
| ethnicity_re | White other:No religion | -0.079403 | 0.007588 | -10.46395 | 0        | -0.094276 |
| ethnicity_re | White other:Muslim      | 0.036605  | 0.020613 | 1.775811  | 0.075764 | -0.003797 |
| ethnicity_re | White other:Jewish      | -0.035925 | 0.026481 | -1.356649 | 0.174893 | -0.087827 |
| ethnicity_re | White other:Hindu       | -0.155274 | 0.102956 | -1.508161 | 0.131513 | -0.357068 |
| ethnicity_re | White other:Buddhist    | 0.041184  | 0.054558 | 0.754868  | 0.450328 | -0.06575  |
| ethnicity_re | Pakistani:Sikh          | 0.399728  | 0.111005 | 3.600991  | 0.000317 | 0.182158  |
| ethnicity_re | Pakistani:Religious     | -0.098911 | 0.048984 | -2.019255 | 0.043461 | -0.19492  |
| ethnicity_re | Pakistani:Other         | -0.150103 | 0.262402 | -0.572033 | 0.5673   | -0.664411 |
| ethnicity_re | Pakistani:No religion   | 0.029036  | 0.066335 | 0.437709  | 0.661597 | -0.100982 |
| ethnicity_re | Pakistani:Muslim        | 0.086795  | 0.048032 | 1.807002  | 0.070762 | -0.007349 |
| ethnicity_re | Pakistani:Jewish        | -0.106893 | 0.228351 | -0.468111 | 0.639705 | -0.554461 |

|                                |           |          |           |          |           |
|--------------------------------|-----------|----------|-----------|----------|-----------|
| ethnicity_re Pakistani:Hindu   | -0.104523 | 0.141007 | -0.741261 | 0.458535 | -0.380897 |
| ethnicity_re Pakistani:Buddh   | 0.450729  | 0.209874 | 2.14762   | 0.031744 | 0.039377  |
| ethnicity_re Other:Sikh        | 0.279661  | 0.061537 | 4.544601  | 5.50E-06 | 0.159048  |
| ethnicity_re Other:Religion I  | 0.036557  | 0.017455 | 2.094325  | 0.036231 | 0.002345  |
| ethnicity_re Other:Other Rel   | 0.378322  | 0.053473 | 7.075021  | 1.49E-12 | 0.273515  |
| ethnicity_re Other:No religio  | 0.006743  | 0.016382 | 0.411647  | 0.680598 | -0.025365 |
| ethnicity_re Other:Muslim      | 0.18432   | 0.018353 | 10.04289  | 0        | 0.148347  |
| ethnicity_re Other:Jewish      | -0.017052 | 0.050952 | -0.334665 | 0.737878 | -0.116918 |
| ethnicity_re Other:Hindu       | 0.098648  | 0.057584 | 1.713133  | 0.086688 | -0.014216 |
| ethnicity_re Other:Buddhist    | 0.086501  | 0.025996 | 3.32751   | 0.000876 | 0.035549  |
| ethnicity_re Mixed:Sikh        | 0.015176  | 0.078503 | 0.193311  | 0.846715 | -0.13869  |
| ethnicity_re Mixed:Religion I  | 0.003173  | 0.012578 | 0.252258  | 0.800841 | -0.021481 |
| ethnicity_re Mixed:Other Re    | 0.005701  | 0.053626 | 0.106305  | 0.91534  | -0.099406 |
| ethnicity_re Mixed:No religic  | 0.034964  | 0.007641 | 4.575887  | 4.74E-06 | 0.019988  |
| ethnicity_re Mixed:Muslim      | 0.059664  | 0.020644 | 2.890096  | 0.003851 | 0.019201  |
| ethnicity_re Mixed:Jewish      | 0.03619   | 0.068738 | 0.526488  | 0.598549 | -0.098536 |
| ethnicity_re Mixed:Hindu       | -0.021497 | 0.068878 | -0.3121   | 0.754965 | -0.156497 |
| ethnicity_re Mixed:Buddhist    | 0.017037  | 0.045832 | 0.371717  | 0.710103 | -0.072795 |
| ethnicity_re Indian:Sikh       | 0.271964  | 0.061271 | 4.438678  | 9.05E-06 | 0.151872  |
| ethnicity_re Indian:Religion   | 0.13379   | 0.021554 | 6.207101  | 5.40E-10 | 0.091543  |
| ethnicity_re Indian:Other Re   | 0.317661  | 0.029331 | 10.83012  | 0        | 0.260172  |
| ethnicity_re Indian:No religic | 0.10124   | 0.025463 | 3.975943  | 7.01E-05 | 0.051332  |
| ethnicity_re Indian:Muslim     | 0.153486  | 0.021818 | 7.034781  | 2.00E-12 | 0.110722  |
| ethnicity_re Indian:Jewish     | -0.148304 | 0.229928 | -0.645002 | 0.518926 | -0.598962 |
| ethnicity_re Indian:Hindu      | 0.26343   | 0.057408 | 4.588704  | 4.46E-06 | 0.15091   |
| ethnicity_re Indian:Buddhist   | 0.346425  | 0.07991  | 4.335189  | 1.46E-05 | 0.189802  |
| ethnicity_re Chinese:Sikh      | 0.225255  | 0.308234 | 0.730793  | 0.464906 | -0.378884 |
| ethnicity_re Chinese:Religio   | 0.026058  | 0.044057 | 0.591465  | 0.554209 | -0.060293 |
| ethnicity_re Chinese:Other I   | 0.507236  | 0.158268 | 3.204924  | 0.001351 | 0.197031  |
| ethnicity_re Chinese:No reli   | -0.049386 | 0.026955 | -1.83216  | 0.066928 | -0.102217 |
| ethnicity_re Chinese:Muslim    | 0.561463  | 0.089333 | 6.285021  | 3.28E-10 | 0.386369  |
| ethnicity_re Chinese:Jewish    | -24.0688  | 51867.12 | -0.000464 | 0.99963  | -101683.6 |
| ethnicity_re Chinese:Hindu     | 0.328581  | 0.212938 | 1.543078  | 0.122812 | -0.088779 |
| ethnicity_re Chinese:Buddhi    | 0.200278  | 0.0417   | 4.802859  | 1.56E-06 | 0.118547  |
| ethnicity_re Black Caribbea    | 0.162612  | 0.412845 | 0.393881  | 0.693669 | -0.646565 |
| ethnicity_re Black Caribbea    | -0.019245 | 0.021382 | -0.90007  | 0.368083 | -0.061154 |
| ethnicity_re Black Caribbea    | 0.187777  | 0.078304 | 2.398066  | 0.016482 | 0.034302  |
| ethnicity_re Black Caribbea    | -0.062543 | 0.01812  | -3.45163  | 0.000557 | -0.098057 |
| ethnicity_re Black Caribbea    | 0.074215  | 0.063955 | 1.16042   | 0.245878 | -0.051137 |
| ethnicity_re Black Caribbea    | -0.260117 | 0.316447 | -0.821991 | 0.411082 | -0.880352 |
| ethnicity_re Black Caribbea    | 0.057597  | 0.167845 | 0.343157  | 0.731481 | -0.271379 |
| ethnicity_re Black Caribbea    | 0.035987  | 0.16338  | 0.220263  | 0.825667 | -0.284239 |
| ethnicity_re Black African:Si  | 0.205516  | 0.382701 | 0.537015  | 0.591257 | -0.544578 |
| ethnicity_re Black African:R   | -0.013309 | 0.023588 | -0.564243 | 0.572589 | -0.059542 |
| ethnicity_re Black African:O   | -0.065355 | 0.167169 | -0.390948 | 0.695835 | -0.393007 |
| ethnicity_re Black African:N   | -0.021895 | 0.037655 | -0.58147  | 0.560924 | -0.0957   |
| ethnicity_re Black African:M   | 0.181888  | 0.019848 | 9.164131  | 0        | 0.142986  |
| ethnicity_re Black African:Je  | -0.491482 | 0.353732 | -1.38942  | 0.164705 | -1.184795 |
| ethnicity_re Black African:Hi  | 0.214691  | 0.200497 | 1.070793  | 0.284262 | -0.178283 |

|                                |           |          |           |          |           |
|--------------------------------|-----------|----------|-----------|----------|-----------|
| ethnicity_re Black African:Bl  | 0.254012  | 0.236465 | 1.074208  | 0.282729 | -0.209458 |
| ethnicity_re Bangladeshi:Sil   | -0.375304 | 0.259677 | -1.44527  | 0.148382 | -0.884272 |
| ethnicity_re Bangladeshi:Re    | -0.238775 | 0.11029  | -2.164972 | 0.03039  | -0.454944 |
| ethnicity_re Bangladeshi:Otl   | -24.66163 | 57876.63 | -0.000426 | 0.99966  | -113462.9 |
| ethnicity_re Bangladeshi:No    | -0.110557 | 0.127466 | -0.867339 | 0.385756 | -0.360391 |
| ethnicity_re Bangladeshi:Mu    | -0.051668 | 0.107346 | -0.481321 | 0.630288 | -0.262067 |
| ethnicity_re Bangladeshi:Je    | -0.521619 | 0.421899 | -1.236361 | 0.216324 | -1.348541 |
| ethnicity_re Bangladeshi:Hir   | -0.062006 | 0.140014 | -0.442856 | 0.65787  | -0.336433 |
| ethnicity_re Bangladeshi:Bu    | -0.434715 | 0.308069 | -1.411095 | 0.158217 | -1.038531 |
| ethnicity_er White other:We    | 0.101328  | 0.017597 | 5.758244  | 8.50E-09 | 0.066838  |
| ethnicity_er White other:Not   | 0.162234  | 0.029814 | 5.441595  | 5.28E-08 | 0.103799  |
| ethnicity_er Pakistani:Well c  | 0.181734  | 0.019293 | 9.419728  | 0        | 0.14392   |
| ethnicity_er Pakistani:Not w   | 0.336333  | 0.032327 | 10.40397  | 0        | 0.272971  |
| ethnicity_er Other:Well or V   | 0.103133  | 0.018611 | 5.541411  | 3.00E-08 | 0.066655  |
| ethnicity_er Other:Not well c  | 0.23011   | 0.032139 | 7.159948  | 8.07E-13 | 0.167119  |
| ethnicity_er Mixed:Well or V   | -0.065418 | 0.024676 | -2.651042 | 0.008024 | -0.113784 |
| ethnicity_er Mixed:Not well c  | 0.025135  | 0.046598 | 0.539396  | 0.589613 | -0.066197 |
| ethnicity_er Indian:Well or V  | 0.144229  | 0.018646 | 7.735008  | 1.02E-14 | 0.107682  |
| ethnicity_er Indian:Not well c | 0.324111  | 0.033334 | 9.72303   | 0        | 0.258776  |
| ethnicity_er Chinese:Well or   | -0.153156 | 0.030279 | -5.058153 | 4.23E-07 | -0.212502 |
| ethnicity_er Chinese:Not we    | 0.081837  | 0.045057 | 1.816292  | 0.069326 | -0.006475 |
| ethnicity_er Black Caribbean   | -0.050796 | 0.077917 | -0.65192  | 0.514453 | -0.203514 |
| ethnicity_er Black Caribbean   | -0.077033 | 0.194629 | -0.395792 | 0.692259 | -0.458506 |
| ethnicity_er Black African:W   | 0.14546   | 0.02079  | 6.996577  | 2.62E-12 | 0.104711  |
| ethnicity_er Black African:No  | 0.147166  | 0.041989 | 3.504879  | 0.000457 | 0.064868  |
| ethnicity_er Bangladeshi:We    | 0.153423  | 0.021963 | 6.985653  | 2.84E-12 | 0.110376  |
| ethnicity_er Bangladeshi:No    | 0.299731  | 0.035391 | 8.469181  | 0        | 0.230365  |

| Upper CI  | Rate ratio | Rate ratio, lower CI | Rate ratio, upper CI |
|-----------|------------|----------------------|----------------------|
| -16.65529 | 3.14E-08   | 1.68E-08             | 5.84E-08             |
| 2.062351  | 6.949674   | 6.141314             | 7.864435             |
| 1.266351  | 3.287733   | 3.04666              | 3.547882             |
| 0.892002  | 2.309045   | 2.185109             | 2.44001              |
| 0.530246  | 1.625544   | 1.554942             | 1.699351             |
| 0.666191  | 1.869939   | 1.796105             | 1.946807             |
| 0.563654  | 1.678295   | 1.60304              | 1.757082             |
| 0.552659  | 1.62843    | 1.525885             | 1.737867             |
| 0.655146  | 1.714343   | 1.526402             | 1.925424             |
| 0.457319  | 1.280946   | 1.038605             | 1.579833             |
| -0.112017 | 0.88684    | 0.879708             | 0.894029             |
| -0.04627  | 0.951813   | 0.948851             | 0.954784             |
| -0.02421  | 0.974417   | 0.972755             | 0.976081             |
| -0.006264 | 0.992609   | 0.991464             | 0.993756             |
| -0.012269 | 0.986818   | 0.985832             | 0.987806             |
| -0.00819  | 0.990665   | 0.989488             | 0.991844             |
| -0.006701 | 0.991692   | 0.990064             | 0.993322             |
| -0.006974 | 0.990368   | 0.987694             | 0.99305              |
| 0.001302  | 0.996895   | 0.992507             | 1.001302             |
| 0.002485  | 1.002314   | 1.00214              | 1.002488             |
| 0.000701  | 1.000658   | 1.000616             | 1.000701             |
| 0.000285  | 1.000267   | 1.000249             | 1.000285             |
| 3.53E-05  | 1.000025   | 1.000015             | 1.000035             |
| 9.42E-05  | 1.000086   | 1.000078             | 1.000094             |
| 6.00E-05  | 1.000051   | 1.000042             | 1.00006              |
| 5.34E-05  | 1.000043   | 1.000032             | 1.000053             |
| 6.71E-05  | 1.000051   | 1.000035             | 1.000067             |
| 3.73E-05  | 1.000014   | 0.999991             | 1.000037             |
| -0.077471 | 0.923436   | 0.921422             | 0.925454             |
| 0.200068  | 1.216038   | 1.210615             | 1.221486             |
| 0.084602  | 1.08347    | 1.078678             | 1.088284             |
| 0.144759  | 1.150832   | 1.145924             | 1.15576              |
| 0.136643  | 1.141626   | 1.136853             | 1.146419             |
| 0.275602  | 1.310329   | 1.303372             | 1.317323             |
| -0.125021 | 0.877997   | 0.873538             | 0.882478             |
| -0.004228 | 0.991472   | 0.987182             | 0.995781             |
| 0.154283  | 1.16158    | 1.156363             | 1.166821             |
| 0.081327  | 1.079074   | 1.073451             | 1.084725             |
| 0.107168  | 1.107933   | 1.10277              | 1.113121             |
| 0.118426  | 1.121028   | 1.116353             | 1.125723             |
| 0.157422  | 1.155403   | 1.14051              | 1.17049              |
| 0.240807  | 1.25558    | 1.239104             | 1.272276             |
| 0.171259  | 1.17129    | 1.155984             | 1.186798             |
| 0.253485  | 1.271547   | 1.254809             | 1.288508             |
| 0.01738   | 1.015736   | 1.013943             | 1.017532             |
| 0.400358  | 1.475337   | 1.45851              | 1.492359             |

|           |          |          |          |
|-----------|----------|----------|----------|
| -0.113778 | 0.884514 | 0.876643 | 0.892456 |
| -0.252859 | 0.710462 | 0.649976 | 0.776577 |
| -0.289764 | 0.73728  | 0.726287 | 0.748441 |
| -0.053598 | 0.93843  | 0.92914  | 0.947813 |
| -0.32401  | 0.706155 | 0.689471 | 0.723243 |
| -0.524599 | 0.565032 | 0.539482 | 0.591792 |
| -0.086354 | 0.905076 | 0.893044 | 0.91727  |
| -0.425317 | 0.645581 | 0.637696 | 0.653563 |
| 0.103958  | 0.901225 | 0.732013 | 1.109554 |
| -0.008271 | 0.988454 | 0.985156 | 0.991763 |
| -0.018971 | 0.977867 | 0.974538 | 0.981207 |
| -0.027953 | 0.969022 | 0.965622 | 0.972434 |
| -0.062409 | 0.935949 | 0.932413 | 0.939499 |
| -0.015988 | 0.875509 | 0.778869 | 0.984139 |
| -0.098057 | 0.902061 | 0.897546 | 0.906597 |
| -0.21512  | 0.788335 | 0.770631 | 0.806445 |
| -0.042622 | 0.955776 | 0.953286 | 0.958274 |
| -0.221484 | 0.777407 | 0.7542   | 0.801329 |
| -0.047895 | 0.935388 | 0.917877 | 0.953234 |
| 0.009398  | 0.904653 | 0.810741 | 1.009442 |
| -0.168385 | 0.8156   | 0.787197 | 0.845028 |
| 0.071714  | 1.065706 | 1.057133 | 1.074348 |
| 0.073405  | 1.063495 | 1.050974 | 1.076166 |
| 0.134773  | 1.138653 | 1.133056 | 1.144276 |
| 0.128773  | 1.131248 | 1.125099 | 1.137431 |
| 0.104892  | 1.104872 | 1.099182 | 1.110591 |
| 0.09071   | 1.089152 | 1.083383 | 1.094952 |
| 0.16099   | 1.164461 | 1.154337 | 1.174673 |
| -0.093148 | 0.908013 | 0.904977 | 0.911059 |
| -0.097554 | 0.904208 | 0.901372 | 0.907053 |
| -0.068078 | 0.925993 | 0.91787  | 0.934188 |
| -0.270565 | 0.752263 | 0.741727 | 0.762948 |
| 0.304433  | 1.319879 | 1.284858 | 1.355856 |
| -0.136582 | 0.844356 | 0.817275 | 0.872335 |
| -0.336229 | 0.675944 | 0.639505 | 0.714459 |
| 0.030141  | 0.778304 | 0.587771 | 1.0306   |
| -0.016982 | 0.961274 | 0.939873 | 0.983162 |
| 0.128662  | 1.039953 | 0.950935 | 1.137306 |
| -0.06453  | 0.923668 | 0.910032 | 0.937508 |
| 0.077007  | 1.037283 | 0.99621  | 1.080049 |
| 0.015977  | 0.964713 | 0.91592  | 1.016105 |
| 0.04652   | 0.85618  | 0.699725 | 1.047619 |
| 0.148118  | 1.042044 | 0.936365 | 1.15965  |
| 0.617298  | 1.491419 | 1.199804 | 1.853912 |
| -0.002903 | 0.905823 | 0.8229   | 0.997102 |
| 0.364206  | 0.860619 | 0.514576 | 1.43937  |
| 0.159053  | 1.029461 | 0.903949 | 1.1724   |
| 0.180938  | 1.090673 | 0.992678 | 1.198341 |
| 0.340674  | 0.898621 | 0.574382 | 1.405895 |

|           |          |          |          |
|-----------|----------|----------|----------|
| 0.171851  | 0.900754 | 0.683248 | 1.187501 |
| 0.862081  | 1.569456 | 1.040162 | 2.368085 |
| 0.400273  | 1.322681 | 1.172395 | 1.492232 |
| 0.070769  | 1.037233 | 1.002347 | 1.073333 |
| 0.483128  | 1.459832 | 1.314577 | 1.621138 |
| 0.038852  | 1.006766 | 0.974954 | 1.039616 |
| 0.220292  | 1.2024   | 1.159916 | 1.24644  |
| 0.082815  | 0.983093 | 0.889658 | 1.08634  |
| 0.211512  | 1.103678 | 0.985885 | 1.235545 |
| 0.137452  | 1.090352 | 1.036189 | 1.147347 |
| 0.169041  | 1.015291 | 0.870498 | 1.184169 |
| 0.027827  | 1.003178 | 0.978749 | 1.028217 |
| 0.110807  | 1.005717 | 0.905375 | 1.11718  |
| 0.04994   | 1.035582 | 1.020189 | 1.051208 |
| 0.100126  | 1.06148  | 1.019387 | 1.105311 |
| 0.170915  | 1.036852 | 0.906163 | 1.18639  |
| 0.113504  | 0.978733 | 0.855134 | 1.120196 |
| 0.106868  | 1.017183 | 0.929791 | 1.112788 |
| 0.392056  | 1.31254  | 1.164011 | 1.48002  |
| 0.176036  | 1.143152 | 1.095864 | 1.192481 |
| 0.37515   | 1.37391  | 1.297153 | 1.45521  |
| 0.151147  | 1.106542 | 1.052672 | 1.163168 |
| 0.196249  | 1.165891 | 1.117084 | 1.21683  |
| 0.302354  | 0.862169 | 0.549382 | 1.35304  |
| 0.375951  | 1.301387 | 1.162892 | 1.456376 |
| 0.503049  | 1.414004 | 1.20901  | 1.653756 |
| 0.829394  | 1.252642 | 0.684625 | 2.29193  |
| 0.112409  | 1.0264   | 0.941489 | 1.11897  |
| 0.817441  | 1.660695 | 1.217782 | 2.264697 |
| 0.003446  | 0.951814 | 0.902834 | 1.003452 |
| 0.736556  | 1.753235 | 1.471628 | 2.08873  |
| 101635.5  | 3.52E-11 | 0        | Inf      |
| 0.74594   | 1.388995 | 0.915048 | 2.108422 |
| 0.28201   | 1.221743 | 1.125859 | 1.325792 |
| 0.971789  | 1.17658  | 0.523842 | 2.642668 |
| 0.022663  | 0.980939 | 0.940679 | 1.022922 |
| 0.341252  | 1.206565 | 1.034897 | 1.406708 |
| -0.027028 | 0.939373 | 0.906597 | 0.973334 |
| 0.199567  | 1.077038 | 0.950148 | 1.220874 |
| 0.360119  | 0.770962 | 0.414637 | 1.4335   |
| 0.386574  | 1.059288 | 0.762327 | 1.471929 |
| 0.356212  | 1.036642 | 0.752587 | 1.42791  |
| 0.95561   | 1.228159 | 0.580087 | 2.600256 |
| 0.032923  | 0.986779 | 0.942196 | 1.033471 |
| 0.262298  | 0.936735 | 0.675024 | 1.299913 |
| 0.051909  | 0.978343 | 0.908737 | 1.05328  |
| 0.220789  | 1.199479 | 1.153714 | 1.24706  |
| 0.201832  | 0.611719 | 0.305809 | 1.223643 |
| 0.607665  | 1.239479 | 0.836705 | 1.836139 |

|           |          |          |          |
|-----------|----------|----------|----------|
| 0.717483  | 1.289187 | 0.811023 | 2.049268 |
| 0.133664  | 0.68708  | 0.413015 | 1.143008 |
| -0.022606 | 0.787592 | 0.634483 | 0.977647 |
| 113413.5  | 1.95E-11 | 0        | Inf      |
| 0.139278  | 0.895336 | 0.697404 | 1.149443 |
| 0.158731  | 0.949644 | 0.76946  | 1.172022 |
| 0.305302  | 0.593559 | 0.259619 | 1.357035 |
| 0.212421  | 0.939877 | 0.714314 | 1.236669 |
| 0.169101  | 0.647449 | 0.353974 | 1.18424  |
| 0.135818  | 1.10664  | 1.069122 | 1.145474 |
| 0.220668  | 1.176135 | 1.109377 | 1.24691  |
| 0.219548  | 1.199295 | 1.154792 | 1.245514 |
| 0.399694  | 1.399805 | 1.313862 | 1.491369 |
| 0.139611  | 1.108639 | 1.068927 | 1.149827 |
| 0.293102  | 1.258739 | 1.181895 | 1.34058  |
| -0.017052 | 0.936676 | 0.892451 | 0.983092 |
| 0.116466  | 1.025453 | 0.935946 | 1.12352  |
| 0.180776  | 1.155149 | 1.113694 | 1.198147 |
| 0.389446  | 1.382801 | 1.295343 | 1.476163 |
| -0.093809 | 0.857996 | 0.808558 | 0.910457 |
| 0.170149  | 1.085279 | 0.993546 | 1.185481 |
| 0.101922  | 0.950473 | 0.815859 | 1.107297 |
| 0.304441  | 0.92586  | 0.632228 | 1.355866 |
| 0.186209  | 1.156572 | 1.11039  | 1.204674 |
| 0.229464  | 1.158546 | 1.067018 | 1.257925 |
| 0.19647   | 1.165818 | 1.116698 | 1.217099 |
| 0.369097  | 1.349496 | 1.25906  | 1.446428 |
